# Supplementary material for: A Comparison of Beta-Phenyl elimination in Nickel and Palladium Alkyl Complexes, a Potentially Relevant Process in the Mizoroki-Heck Reaction
Source: Preprints.org preprint supplement (doi:10.20944/preprints202402.1230.v1), 2024-02-21
Supplement: Supplementary file 1 [file supplementary]

**A comparison of b-Phenyl elimination in Nickel and Palladium alkyl complexes, a potentially relevant process in the Mizoroki-Heck Reaction.**

Jorge A. López, Diego A. Cabo, Pilar Palma and Juan Cámpora.*

*Instituto de Investigaciones Químicas, CSIC – Universidad de Sevilla.*

*Centro de Investigaciones Científicas “Isla de la Cartuja”*

*C/ Américo Vespucio, 49, 41092, Sevilla*

**SUPPLEMENTARY INFORMATION**

*Detail of Computational Results: Energy Components and Molecular Structures (Ball and Spoke Molecular views and Fractional Coordinates) for optimized stationary point geometries.*

CONTENTS **Page**

1. **Effect of the steric bulk of diphosphine ligands on the p-arene**

**interaction in cationic diphosphine neophyl-nickel and Palladium complexes.**

**Figure S1.** Tube molecular views and

distances in nickel and palladium s,p-complexes ……………………………………………...**3**

**Table S1.** Fractional coordinates for the DiPPE and DtBPE Ni complexes……………….……**3**

**2. Conformational isomers of the neophyl-nickel DMPE triflate species [Ni(CH2CMe2Ph)(DMPE)OTf]**

**Table S2.** Energies and relative stability of

DMPE-stabilized neophylnickel-triflate conformational isomers…………………………………………………………………………………………**4**

**3. Energy Components, and Optimized Geometries for all stationary points**

**involeved in b-Ph Elimination and Hydrolyses Reactions.**

**Table S3.** SCF, ZPE, and Gº Energies for species involved in

b-Ph eliminations and hydrolysis reactions……………………………………………………**7**

**Table S4.** Molecular structures and fractional coordinates of the

species involved in b-Ph elimination and hydrolysis………………………………………….**9**

**1. Effect of the steric bulk of diphosphine ligands on the p-arene interaction in cationic diphosphine neophyl-nickel and Palladium complexes.**

**Figure S1.** Tube molecular views and distances in nickel and palladium s,p-complexes (H-atoms omitted for clarity.

**Table S1.** Fractional coordinates for the DiPPE and DtBPE Ni complexes (for DMPE derivatives, see Table S3)

.

**[Ni(CH2CMe2Ph)(DiPPE)]**

72

H -4.257631 -0.052475 -1.079159

C -0.187083 -2.465014 -1.683587

C -0.185653 -2.601669 -3.200395

C 0.025335 -3.801716 -0.986107

H 2.618101 -3.345205 -2.503262

H -0.899437 -3.383623 -3.490505

H 0.793613 -2.892333 -3.598874

H -0.694232 -4.533434 -1.374517

H -0.130398 -3.740534 0.095966

H 1.028424 -4.209518 -1.166213

H -1.014874 -3.229586 2.676118

H 0.886512 -2.798343 4.333042

C -2.645213 1.366897 -0.832108

C -1.018500 4.071156 -1.495154

C 2.682241 -1.830312 -0.918244

C 3.193487 -2.462044 -2.205309

C 1.047221 0.136313 -2.346260

C -0.312484 3.156048 -0.507868

C 3.622762 -0.738134 -0.420875

C -3.362289 2.084276 0.299187

C -3.163911 -0.055834 -0.984269

C -0.253965 0.918657 -2.363698

C 1.202648 3.267700 -0.616133

H 0.943588 -2.644688 1.403243

H -0.677907 5.105488 -1.351762

H -2.107968 4.068026 -1.373908

H -0.793264 3.803995 -2.536558

H 4.233684 -2.785147 -2.066846

H 3.186853 -1.749684 -3.041295

H 1.890914 0.789910 -2.086541

H 1.278107 -0.304688 -3.325423

H -0.495576 -1.681195 -3.708197

H 4.595387 -1.171158 -0.156196

H 3.234150 -0.218331 0.464895

H 3.807044 0.015458 -1.198384

H -4.417726 2.231361 0.035261

H -2.939251 3.069849 0.530454

H -3.338611 1.487210 1.218390

H -2.913433 -0.662276 -0.100928

H -2.765749 -0.564868 -1.870696

H -1.055591 0.319420 -2.816583

H -0.167210 1.824266 -2.978434

H 1.534241 4.280383 -0.353164

H 1.540082 3.076063 -1.644665

H 1.722686 2.560458 0.045518

Ni 0.234756 -0.152849 0.726798

P 0.966783 -1.150320 -1.035394

P -0.795247 1.366762 -0.644085

C 0.998412 -1.619920 1.782535

C 0.882665 1.023779 2.677560

C -0.217372 0.152287 2.878728

C 0.721278 2.412983 2.753146

C 0.038613 -1.362921 2.938611

C -1.245886 -2.158407 2.721626

C -0.528129 2.957470 3.021728

C 0.649677 -1.726356 4.295163

C -1.480172 0.733732 3.105525

C -1.628935 2.112803 3.191580

H 2.046061 -1.399685 2.028662

H 1.890486 0.619292 2.581051

H 1.587049 3.062341 2.616274

H -1.741412 -1.883652 1.778385

H -1.966960 -2.015810 3.536070

H -0.651671 4.039170 3.092395

H 1.577377 -1.169040 4.475942

H -0.048279 -1.502935 5.114979

H -2.352179 0.093434 3.243351

H -2.614857 2.537338 3.384893

H -2.826258 1.912517 -1.773603

H 2.614443 -2.610948 -0.144346

H -1.178699 -2.090134 -1.383386

H -0.611905 3.443185 0.511263

**[Ni(CH2CMe2Ph)(DtBPE)]**

84

H -4.518756 2.157569 -1.649987

C 0.324196 -2.907208 -1.593856

C -1.142945 -2.931382 -1.163119

C 0.370447 -3.052561 -3.115834

C 1.046369 -4.099953 -0.969095

H -1.576411 -3.906659 -1.425506

H -1.275017 -2.787477 -0.083935

H 3.318891 -2.913899 -2.416186

H 0.000392 -4.053234 -3.377925

H 1.379800 -2.960234 -3.531856

H 0.501429 -5.012594 -1.247216

H 1.077895 -4.066536 0.124582

H 2.069913 -4.214219 -1.341329

H 3.056410 -3.164165 0.278526

H -1.920255 -2.757691 2.497685

H -0.074243 -2.999106 4.250362

C -2.816818 1.333317 -0.629349

C -0.351481 3.603673 -2.295087

C 2.963581 -1.317541 -0.948407

C 3.526718 -1.848647 -2.266436

C 0.774822 -0.094461 -2.456836

C -0.203141 3.019801 -0.892221

C 3.472863 0.107981 -0.719019

C -3.349179 -0.080092 -0.878686

C 3.478183 -2.158113 0.219245

C -0.858808 3.949964 0.124884

C -3.425132 2.269636 -1.669152

C -0.619778 0.501872 -2.387366

C -3.259942 1.729139 0.777710

C 1.289085 2.935230 -0.568939

H 0.203991 -2.801114 1.414923

H 0.021630 4.637673 -2.284411

H -1.386376 3.636435 -2.650120

H 0.249110 3.060755 -3.035043

H -1.734092 -2.171759 -1.684423

H 4.619691 -1.734347 -2.253180

H 3.155611 -1.296733 -3.139039

H 1.532607 0.694382 -2.404537

H 0.946808 -0.607460 -3.410287

H -0.281177 -2.331604 -3.623243

H 4.547850 0.060676 -0.498756

H 2.981895 0.586837 0.140168

H 3.358834 0.755079 -1.594776

H -4.417072 -0.104190 -0.622841

H -2.848715 -0.829580 -0.252472

H -3.266728 -0.394546 -1.924851

H 4.565632 -2.267088 0.106682

H 3.309071 -1.655844 1.177259

H -0.307171 4.900519 0.141290

H -0.829050 3.539637 1.140605

H -1.898362 4.186607 -0.124853

H -3.093924 2.031858 -2.688351

H -3.210487 3.325315 -1.472472

H -1.368213 -0.284872 -2.532069

H -0.785211 1.225697 -3.194425

H -4.358073 1.762746 0.806291

H -2.894830 2.706458 1.104657

H -2.937872 0.983612 1.513907

H 1.712271 3.949891 -0.554363

H 1.848047 2.370660 -1.321820

H 1.476124 2.480274 0.409899

Ni 0.119078 -0.281565 0.682555

P 1.068365 -1.239310 -1.027769

P -0.919242 1.258679 -0.723211

C 0.537669 -1.832636 1.798765

C 1.126462 0.749947 2.708996

C -0.154989 0.213306 2.964308

C 1.389607 2.109495 2.914562

C -0.367736 -1.310128 2.908369

C -1.820958 -1.669902 2.598545

C 0.389777 2.953371 3.379367

C 0.025713 -1.905535 4.267039

C -1.151232 1.091430 3.431368

C -0.885122 2.437825 3.638282

H 1.578630 -1.925746 2.120376

H 1.955558 0.094445 2.443448

H 2.391425 2.496427 2.722861

H -2.160866 -1.221756 1.652668

H -2.513236 -1.350813 3.386706

H 0.597240 4.011624 3.545057

H 1.064878 -1.662226 4.520818

H -0.622815 -1.515109 5.064421

H -2.144092 0.705206 3.661288

H -1.675021 3.094590 4.006182

**2. Conformational isomers of the neophyl-nickel DMPE triflate species [Ni(CH2CMe2Ph)(DMPE)OTf]**

**Table S2.** Energies and relative stability of DMPE-stabilized neophylnickel-triflate conformational isomers.

| **Conformer No.** | **M06-L/SPVD/CPCM (dichloromethane)** | | | **Single point**  **M06-L/SVPD (g)**  E(SCF,g) | | **Correctionsa** | | | | **Single point**  **M06/TZVPPD**  E(SCF,g) | | **Go estimb** | **DGo** |
| --- | --- | --- | --- | --- | --- | --- | --- | --- | --- | --- | --- | --- | --- |
|  | E(SCF) | Gº | ZPE | TC | | SC | |
| Ni-M0001 | -2370894,423 | -2370651,774 | 275,656 | -2370879,625 | 242,649 | | -14,798 | | -2371688,892 | | -2371461,041 | | 0,00 |
| Ni-M0005 | -2370894,56 | -2370650,548 | 276,682 | -2370876,623 | 244,012 | | -17,937 | | -2371686,656 | | -2371460,581 | | 0,46 |
| Ni-M0008 | -2370893,627 | -2370649,716 | 276,578 | -2370876,553 | 243,911 | | -17,074 | | -2371686,900 | | -2371460,063 | | 0,98 |
| Ni-M0003 | -2370894,381 | -2370651,660 | 275,728 | -2370879,424 | 242,721 | | -14,957 | | -2371687,803 | | -2371460,039 | | 1,00 |
| Ni-M0004 | -2370892,849 | -2370649,101 | 276,498 | -2370876,288 | 243,748 | | -16,561 | | -2371686,570 | | -2371459,383 | | 1,66 |
| Ni-M0006 | -2370892,628 | -2370647,405 | 277,709 | -2370875,93 | 245,223 | | -16,698 | | -2371686,174 | | -2371457,649 | | 3,39 |
| Ni-M0007 | -2370888,91 | -2370644,250 | 277,250 | -2370869,696 | 244,66 | | -19,214 | | -2371679,504 | | -2371454,058 | | 6,98 |

(a): Corrections (@ M06-L/SVPD): TC (Thermal Correction) = G(solv)-E(SCF, solv); SC (solvent correction) = E(SCF, solv)-E(SCF, g). (b) Gº estim. = E(SCF, g, M06/TZVPPD)+TC+SC

**Figure S2.** Geometries of seven neophylnickel-triflate conformational isomers. H atoms omitted for clarity, in order of increasing energy..

**3. Energy Components and Optimized Geometries for all stationary points involved in b-Ph Elimination and Hydrolyses Reactions.**

**Table S3.** SCF, ZPE, and Gº Energies for species involved in c b-Ph eliminations and hydrolysis reactions

| **Species** | **M06-L/SPVD** | | | | **Single point**  **M06-L/SVPD (g)**  E(SCF,g) | | **Correctionsa** | | | | **Single point**  **M06/TZVPPD**  E(SCF,g) | | **Go estimb**  E(SCF)+TC+SC |
| --- | --- | --- | --- | --- | --- | --- | --- | --- | --- | --- | --- | --- | --- |
| i-Frq  (cm-1) | E(SCF) | Gº | ZPE | TC | | SC | |
| triflate(-) |  | -603054,637 | -603057,713 | 16,770 | -603004,932 | -3,076 | | -49,705 | | -603424,817 | | -603477,598 | |
| CH2=CMe2 |  | -98576,776 | -98526,846 | 67,043 | -98575,437 | 49,93 | | -1,339 | | -98614,31 | | -98565,719 | |
| H2O |  | -47925,175 | -47922,811 | 13,440 | -47919,859 | 2,364 | | -5,316 | | -47959,482 | | -47962,434 | |
| C6H6 |  | -145617,925 | -145572,49 | 62,678 | -145615,918 | 45,435 | | -2,007 | | -145671,535 | | -145628,107 | |
| PMe3 |  | -289213,296 | -289161,854 | 69,861 | -289210,791 | 51,442 | | -2,505 | | -289306,023 | | -289257,086 | |
|  |  |  |  |  |  |  | |  | |  | |  | |
| **6'** |  | -1767823,669 | -1767593,483 | 258,930 | -1767786,38 | 230,186 | | -37,289 | | -1768182,057 | | -1767989,160 | |
| **TS1-Ni** | 261 | -1767803,054 | -1767574,863 | 257,269 | -1767765,741 | 228,191 | | -37,313 | | -1768161,811 | | -1767970,933 | |
| [Ni(Ph)(CH2=CMe2∥)(DMPE)]+ |  | -1767812,271 | -1767584,524 | 257,149 | -1767773,174 | 227,747 | | -39,097 | | -1768169,047 | | -1767980,397 | |
| **TS2-Ni** | <20 | -1767810,454 | -1767582,197 | 257,518 | -1767771,788 | 228,257 | | -38,666 | | -1768167,791 | | -1767978,200 | |
| [Ni(Ph)(CH2=CMe2⊥)(DMPE)]+ |  | -1767810,577 | -1767582,232 | 257,581 | -1767771,955 | 228,345 | | -38,622 | | -1768167,447 | | -1767977,724 | |
| [Ni(Ph)(DMPE)](+) |  | -1669207,019 | -1669045,493 | 188,221 | -1669167,165 | 161,526 | | -39,864 | | -1669528,647 | | -1669406,975 | |
| [Ni(Ph)(H2O)(DMPE)](+) |  | -1717155,662 | -1716978,895 | 204,489 | -1717111,89 | 176,767 | | -43,772 | | -1717511,141 | | -1717378,146 | |
| **TS3-Ni** | 1588 | -1717134,673 | -1716960,96 | 201,372 | -1717091,355 | 173,713 | | -43,318 | | -1717489,647 | | -1717359,252 | |
| [Ni(OH)(Ph-H)(DMPE)](+) |  | -1717155,290 | -1716978,543 | 204,401 | -1717111,969 | 176,747 | | -43,321 | | -1717508,64 | | -1717375,214 | |
| ***cis-*5a'** |  | -3143106,992 | -3142854,133 | 285,219 | -3142976,648 | 252,859 | | -130,344 | | -3143659,709 | | -3143537,194 | |
| **t*rans-*5a’** |  | -3143102,310 | -3142850,783 | 284,211 | -3142977,868 | 251,527 | | -124,442 | | -3143663,911 | | -3143536,826 | |
|  |  |  |  |  |  |  | |  | |  | |  | |
| **Table S3** (cont). | | | | | | | | | | | | | |
| [Ni(CH2CMe2Ph)(PMe3)(DMPE)]+ (c) |  | -2057062,072 | -2056761,611 | 332,327 | -2057024,568 | 300,461 | | -37,504 | | -2057511,458 | | -2057248,501 | |
| **IV’** |  | -2057057,207 | -2056757,714 | 331,583 | -2057020,034 | 299,493 | | -37,173 | | -2057505,827 | | -2057243,507 | |
| **TS4** | 219 | -2057027,841 | -2056730,218 | 329,976 | -2056991,268 | 297,623 | | -36,573 | | -2057477,077 | | -2057216,027 | |
| **13’** |  | -2057037,706 | -2056740,930 | 329,612 | -2057000,207 | 296,776 | | -37,499 | | -2057486,692 | | -2057227,415 | |
| **TS5** | 39 | -2057037,180 | -2056740,255 | 329,670 | -2056999,873 | 296,925 | | -37,307 | | -2057486,295 | | -2057226,677 | |
| [Ni(Ph)(PMe3)(DMPE)]+ |  | -1958467,339 | -1958237,426 | 260,426 | -1958428,968 | 229,913 | | -38,371 | | -1958883,597 | | -1958692,055 | |
|  |  |  |  |  |  |  | |  | |  | |  | |
| **1’** |  | -901778,726 | -901549,236 | 258,602 | -901741,65 | 229,49 | | -37,076 | | -902002,587 | | -901810,173 | |
| **TS1-Pd** | 319 | -901752,681 | -901524,987 | 257,106 | -901716,339 | 227,694 | | -36,342 | | -901977,634 | | -901786,282 | |
| [Pd(Ph)(CH2=CMe2-∥)(DMPE)]+ |  | -901767,748 | -901540,368 | 257,103 | -901729,549 | 227,38 | | -38,199 | | -901991,607 | | -901802,426 | |
| **TS2-Pd** | <20 | -901767,302 | -901540,130 | 256,979 | -901728,785 | 227,172 | | -38,517 | | -901989,636 | | -901800,981 | |
| [Pd(Ph)(CH2=CMe2-⊥)(DMPE)]+ |  | -901767,882 | -901540,833 | 256,845 | -901729,379 | 227,049 | | -38,503 | | -901991,087 | | -901802,541 | |
| [Pd(Ph)(DMPE)]+ |  | -803165,648 | -803004,830 | 187,89 | -803125,806 | 160,818 | | -39,842 | | -803349,498 | | -803228,522 | |
| [Pd(Ph)(H2O)(DMPE)]+ |  | -851109,237 | -850933,664 | 203,688 | -851066,32 | 175,573 | | -42,917 | | -851328,606 | | -851195,95 | |
| **TS3-Pd** | 1659 | -851085,166 | -850912,460 | 200,757 | -851042,190 | 172,706 | | -42,976 | | -851302,623 | | -851172,893 | |
| [Pd(OH)(h2-Ph-H)(DMPE)]+ |  | -851108,676 | -850932,625 | 204,062 | -851063,854 | 176,051 | | -44,822 | | -851323,82 | | -851192,591 | |
| *cis*-[Pd(m-OH)(DMPE)]22+ |  | -1411001,355 | -1410750,471 | 283,926 | -1410879,234 | 250,884 | | -122,121 | | -1411286,985 | | -1411158,222 | |
| *trans*-[Pd(m-OH)(DMPE)]22+ |  | -1411001,480 | -1410750,360 | 284,053 | -1410879,972 | 251,12 | | -121,508 | | -1411288,853 | | -1411159,241 | |
| [Pd(CH2CMe2Ph)(PMe3)(DMPE)]+ (a) |  | -1191019,973 | -1190720,88 | 331,544 | -1190982,547 | 299,093 | | -37,426 | | -1191335,303 | | -1191073,636 | |
| [Pd(Ph)(PMe3)(DMPE)]+ |  | -1092422,922 | -1092193,758 | 259,919 | -1092384,63 | 229,164 | | -38,292 | | -1092703,712 | | -1092512,840 | |

(a): Corrections (@ M06-L/SVPD): TC (Thermal Correction) = G(solv)-E(SCF, solv); SC (solvent correction) = E(SCF, solv)-E(SCF, g). (b) Gº estim. = E(SCF, g, M06/TZVPPD)+TC+SC. (c): Only the most stable conformer shown.

**Figure S3.** Free energy diagram corresponding to Scheme 8. All free energies in Kcal/mol.

**Table S4.** Structure and coordinates of the species involved in b-Ph elimination and hydrolysis

**Water**

**
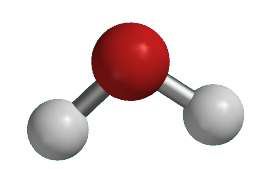
**

3

O 0.000000 0.000000 -0.396669

H 0.000000 -0.757387 0.198335

H 0.000000 0.757387 0.198335

**Triflate Anion**

**
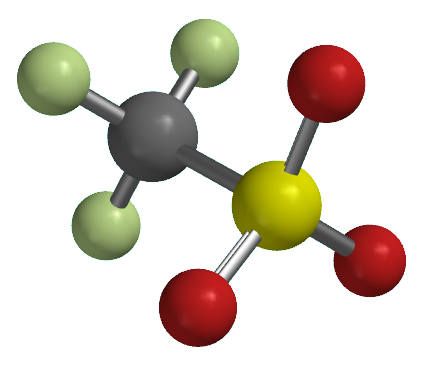
**

8

C 0.412837 0.702019 -0.326133

F -0.154696 1.833775 0.106129

F 1.697625 0.715721 0.047433

F 0.371385 0.702958 -1.663259

S -0.465655 -0.791363 0.367441

O 0.293531 -1.919462 -0.216423

O -0.310056 -0.615552 1.828573

O -1.844970 -0.628096 -0.143760

**Benzene**

**
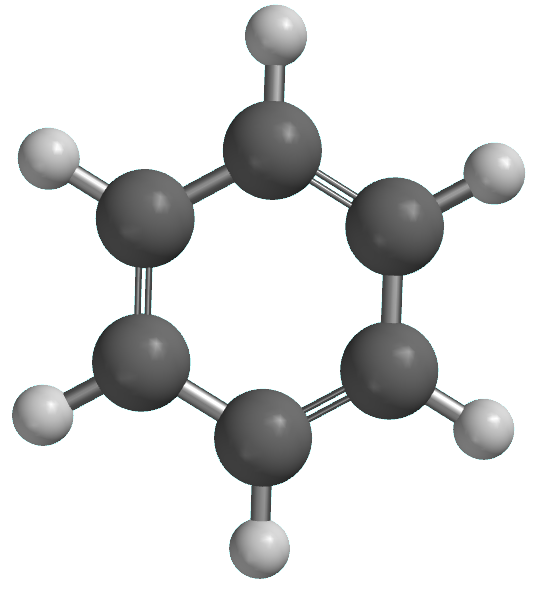
**

12

6 -0.365716 -1.330453 0.211711

6 0.365716 1.330453 -0.211712

6 0.812552 -0.832975 0.770979

6 -1.178255 -0.497409 -0.559355

6 -0.812553 0.832975 -0.770979

6 1.178255 0.497408 0.559356

1 1.448010 -1.484669 1.374011

1 -1.448012 1.484668 -1.374012

1 2.099985 0.886313 0.996760

1 0.651807 2.371054 -0.377227

1 -0.651806 -2.371053 0.377227

1 -2.099984 -0.886314 -0.996758

**Isobutene**

**
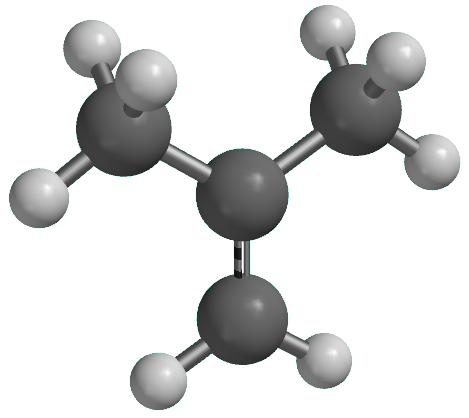
**

12

C 0.190855 1.450692 0.532448

H 1.184164 1.891629 0.640585

H -0.662804 2.071133 0.813731

C 0.026411 0.200858 0.073881

C 1.182896 -0.662570 -0.315906

H 2.146204 -0.157168 -0.182490

H 1.100889 -0.977936 -1.367505

H 1.195744 -1.592112 0.273875

C -1.325149 -0.418822 -0.080917

H -1.406345 -1.339401 0.517427

H -1.499927 -0.724886 -1.123897

H -2.132938 0.258583 0.218768

**[Ni(CH2CMe2Ph)(DMPE)]+, 6’**


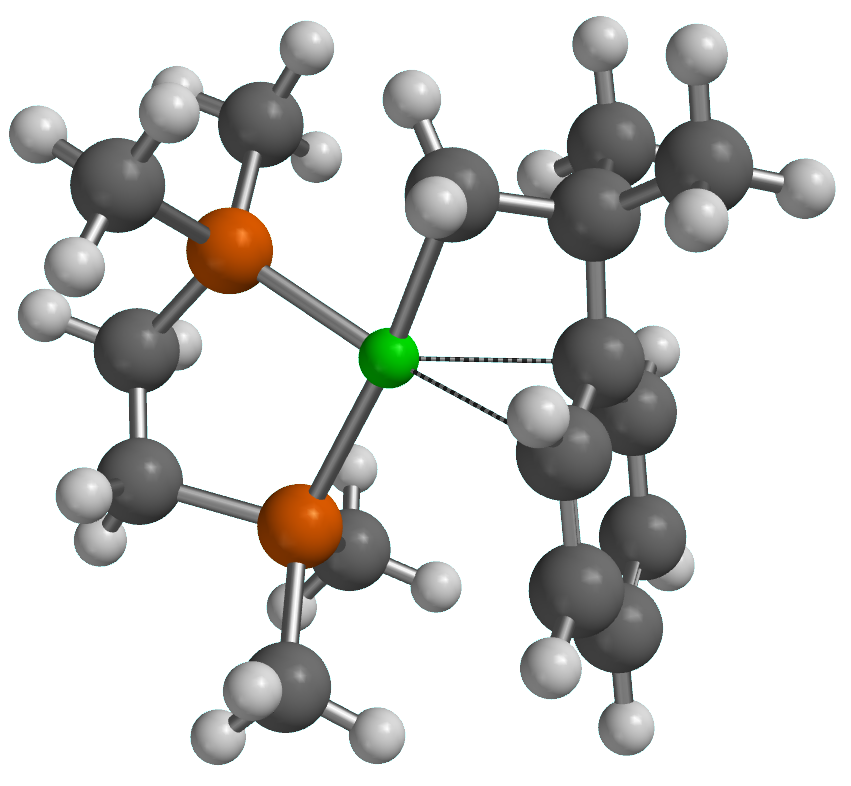


48

Ni -0.032031 0.391586 -0.200987

P -2.110095 0.730352 0.241889

P 0.414350 0.604725 2.020948

C -2.328355 0.830411 2.070165

H -2.486668 -0.197462 2.428099

H -3.240523 1.395088 2.308350

C -1.087075 1.436236 2.698742

H -1.102070 1.363048 3.795173

H -1.003127 2.504413 2.448708

C -2.757281 2.302436 -0.399658

H -2.177757 3.138494 0.008679

H -3.810487 2.422299 -0.114345

H -2.675939 2.323012 -1.492280

C -3.319007 -0.520801 -0.277140

H -3.020655 -1.504616 0.102857

H -3.385175 -0.568811 -1.369174

H -4.306951 -0.265928 0.127424

C 1.772275 1.602448 2.715734

H 2.728580 1.081586 2.600581

H 1.597095 1.781060 3.784535

H 1.835502 2.565910 2.196533

C 0.493560 -0.945852 2.980579

H 1.427909 -1.474540 2.759316

H -0.340223 -1.603189 2.705645

H 0.448425 -0.738198 4.057767

C -0.570608 0.346015 -2.079980

H -0.212519 1.319066 -2.453143

H -1.611908 0.213092 -2.395130

C 0.335378 -0.820111 -2.473032

C 1.718081 -1.916963 -0.565280

C 3.124828 0.463041 -0.162410

C 2.744558 -1.854381 0.369138

C 1.388017 -0.796546 -1.357203

C 2.083372 0.414411 -1.104143

C 3.462316 -0.668486 0.565892

H 2.993237 -2.742655 0.952209

H 4.271408 -0.631669 1.296776

H 3.665123 1.398708 -0.009967

C 0.994159 -0.620393 -3.838625

H 1.569499 0.313088 -3.877398

H 0.230078 -0.574674 -4.626566

H 1.675702 -1.449928 -4.076101

C -0.460875 -2.117892 -2.471982

H 0.165731 -2.987268 -2.710152

H -1.252692 -2.067027 -3.229344

H -0.941058 -2.300791 -1.500837

H 1.187110 -2.857358 -0.712177

H 1.906783 1.285014 -1.738682

**TS1-Ni**


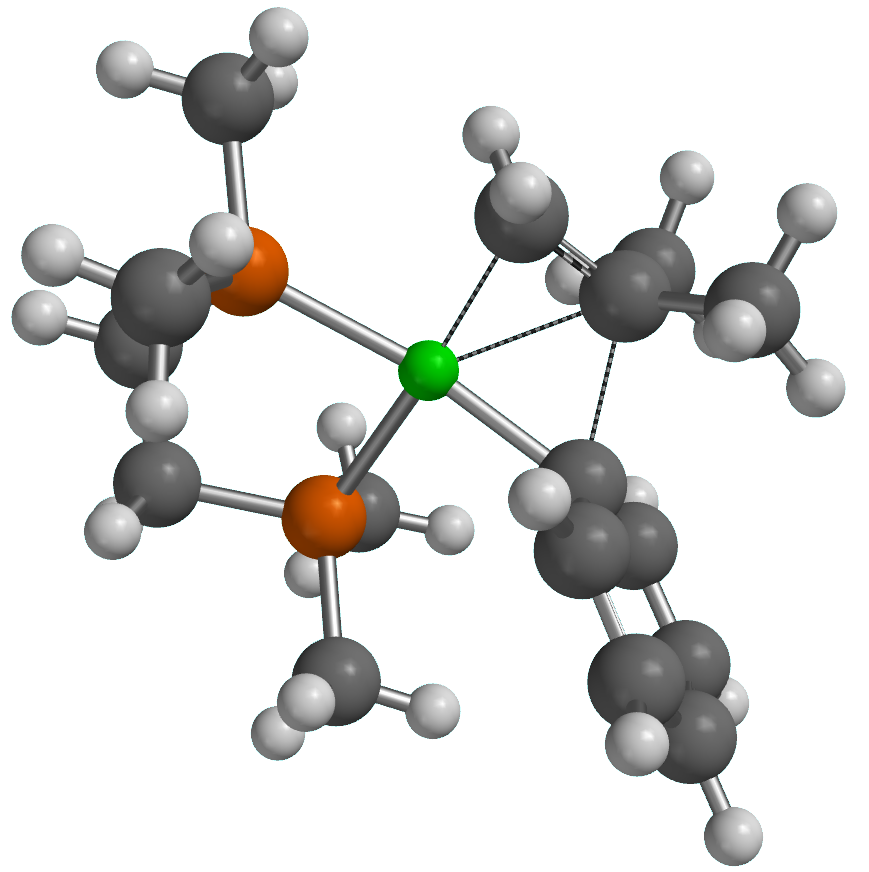


48

Ni -0.464605 0.019020 -0.298265

P -2.347074 0.975981 0.239607

P 0.048879 0.098325 1.865265

C -2.597419 0.814822 2.055010

H -2.977484 -0.201550 2.234418

H -3.372694 1.514798 2.396697

C -1.267864 1.032363 2.757591

H -1.302595 0.739754 3.815698

H -0.982272 2.093737 2.728888

C -2.236874 2.768445 -0.056881

H -1.347964 3.181939 0.434435

H -3.130160 3.278847 0.326527

H -2.150478 2.956672 -1.133498

C -3.927882 0.487153 -0.502396

H -4.086837 -0.589662 -0.372972

H -3.922402 0.714090 -1.574727

H -4.753747 1.032621 -0.029427

C 1.605789 0.860651 2.402350

H 2.455712 0.309001 1.983448

H 1.680587 0.857823 3.497106

H 1.650942 1.894757 2.040761

C 0.043936 -1.549455 2.640782

H 0.808672 -2.184900 2.179169

H -0.933588 -2.025040 2.496638

H 0.249514 -1.470367 3.716072

C -1.107269 -0.250772 -2.112465

H -1.116034 0.646153 -2.741356

H -2.062703 -0.780994 -2.087002

C 0.096089 -1.056843 -2.113846

C 2.236584 -1.420076 -0.232088

C 3.377145 1.048451 -0.854303

C 3.601883 -1.209731 -0.035582

C 1.423850 -0.403738 -0.754294

C 2.021431 0.828396 -1.081162

C 4.177619 0.024597 -0.339292

H 4.217190 -2.015899 0.368688

H 1.417012 1.625071 -1.526180

H 5.244949 0.187379 -0.182699

H 3.816219 2.018183 -1.097119

C 1.027470 -0.839985 -3.288133

H 1.165211 0.221050 -3.518740

H 0.559798 -1.310404 -4.166016

H 2.011014 -1.302030 -3.137952

C -0.113420 -2.518600 -1.791339

H 0.828469 -3.076306 -1.759226

H -0.729095 -2.964363 -2.584658

H -0.642899 -2.672147 -0.841475

H 1.807394 -2.387217 0.033944

**[Ni(Ph)(h2-CH2=CMe2-∥)(DMPE)]+**

**
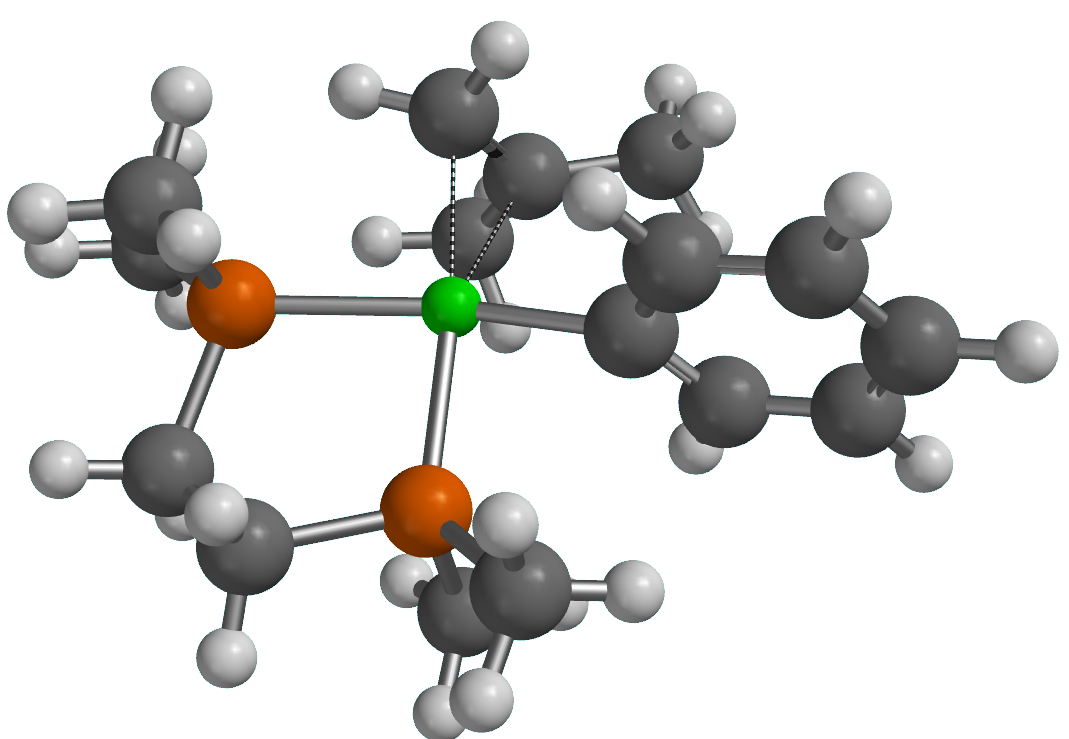
**

48

Ni -0.228190 0.114194 -0.317903

P -2.318913 0.777904 0.267861

P 0.198981 0.172778 1.832268

C -2.495727 0.653972 2.093952

H -2.772191 -0.384758 2.325302

H -3.317184 1.292569 2.446246

C -1.168804 1.019236 2.731115

H -1.124799 0.756443 3.797266

H -0.978696 2.099876 2.659623

C -2.446744 2.565263 -0.068040

H -1.597921 3.096031 0.379478

H -3.380742 2.971897 0.340917

H -2.424726 2.741316 -1.150149

C -3.878551 0.101560 -0.381088

H -3.977801 -0.952357 -0.096163

H -3.910678 0.172771 -1.474882

H -4.728211 0.661890 0.028510

C 1.701972 0.932603 2.502879

H 2.587275 0.369424 2.188583

H 1.647142 0.945340 3.598736

H 1.792129 1.961307 2.135019

C 0.180282 -1.522852 2.488889

H 1.006312 -2.101984 2.062132

H -0.763263 -2.016446 2.227616

H 0.287236 -1.503053 3.581274

C -0.789148 0.281139 -2.364062

H -0.131712 1.025795 -2.820967

H -1.850902 0.524222 -2.354267

C -0.368609 -1.031685 -2.279793

C 2.466611 -1.173476 -0.225241

C 3.722607 1.180057 -1.019114

C 3.853109 -1.143701 -0.392551

C 1.684951 -0.035100 -0.459395

C 2.337125 1.145987 -0.844851

C 4.486899 0.034233 -0.789864

H 4.440336 -2.046672 -0.210500

H 1.760611 2.060204 -1.021929

H 5.570409 0.060722 -0.919166

H 4.207730 2.107707 -1.331929

C 0.900312 -1.488545 -2.916594

H 1.612595 -0.676357 -3.090912

H 0.631119 -1.916271 -3.895089

H 1.393221 -2.288872 -2.352173

C -1.282787 -2.124400 -1.827988

H -0.817177 -2.713634 -1.022284

H -1.456209 -2.834665 -2.650700

H -2.253331 -1.756939 -1.481704

H 1.994052 -2.114673 0.071629

**TS2-Ni**

**
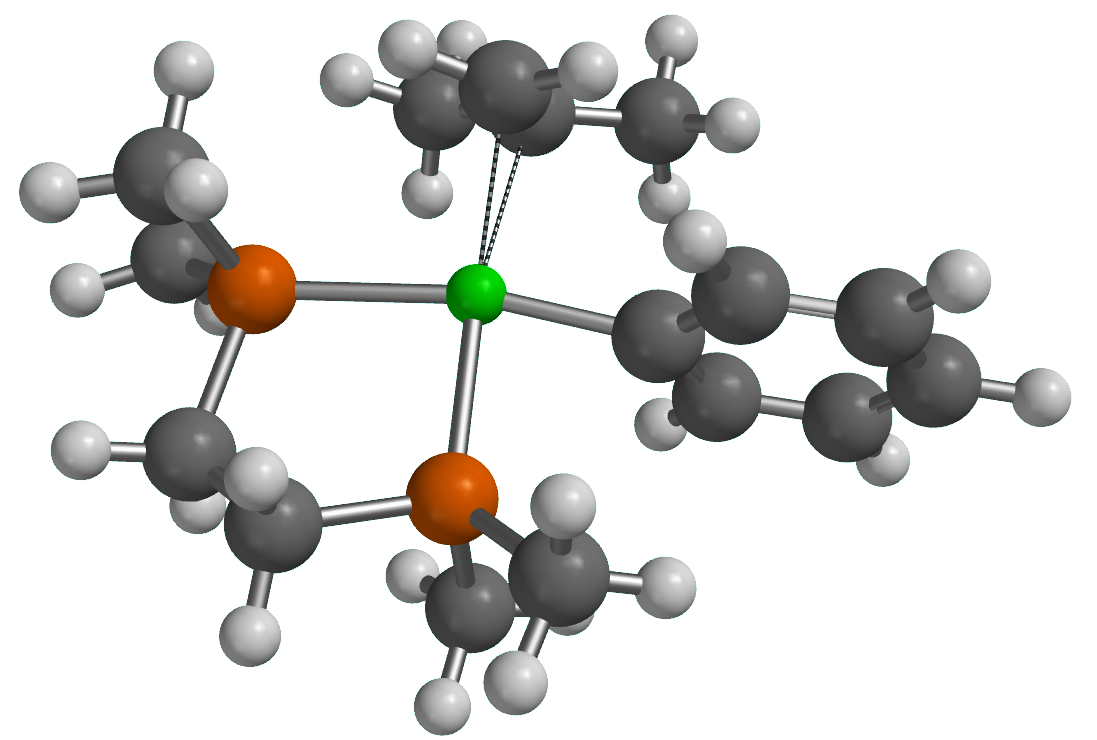
**

48

Ni -0.150643 0.134915 -0.261119

P -2.366429 0.481955 0.323706

P 0.299333 0.380157 1.870481

C -2.408561 0.624032 2.163004

H -2.538064 -0.393365 2.560202

H -3.292611 1.198557 2.471336

C -1.118583 1.237382 2.666933

H -1.020048 1.176524 3.760038

H -1.048668 2.300586 2.394413

C -2.991294 2.101072 -0.239981

H -2.269945 2.891376 0.000578

H -3.951603 2.331451 0.238306

H -3.135829 2.088206 -1.327298

C -3.774610 -0.635970 0.010866

H -3.497558 -1.672429 0.235183

H -4.102698 -0.576989 -1.031626

H -4.614919 -0.344904 0.654172

C 1.755324 1.311879 2.417032

H 2.667243 0.744263 2.201434

H 1.685208 1.491760 3.497205

H 1.809385 2.273386 1.893839

C 0.420754 -1.204641 2.753925

H 1.320306 -1.740901 2.432614

H -0.452714 -1.833555 2.547347

H 0.485272 -1.019012 3.833879

C -0.321758 0.771893 -2.297199

H 0.606338 1.321233 -2.465736

H -1.241570 1.357779 -2.277046

C -0.364479 -0.584428 -2.515892

C 2.304591 -1.379637 -0.132403

C 3.984025 0.704240 -0.891860

C 3.670720 -1.613691 -0.309142

C 1.753201 -0.109449 -0.351016

C 2.618315 0.932237 -0.715276

C 4.516109 -0.571171 -0.689855

H 4.074437 -2.615610 -0.146444

H 2.227374 1.941730 -0.873108

H 5.584533 -0.749600 -0.824019

H 4.637534 1.528450 -1.187009

C 0.829040 -1.355528 -2.968579

H 1.757724 -0.779742 -2.923015

H 0.659705 -1.657420 -4.013223

H 0.957390 -2.286875 -2.399671

C -1.655388 -1.334029 -2.545750

H -1.694881 -2.107987 -1.763649

H -1.752768 -1.869564 -3.500912

H -2.519427 -0.672681 -2.434512

H 1.661189 -2.215884 0.158846

**[Ni(Ph)(h2-CH2=CMe2-**⊥**)(DMPE)]+**


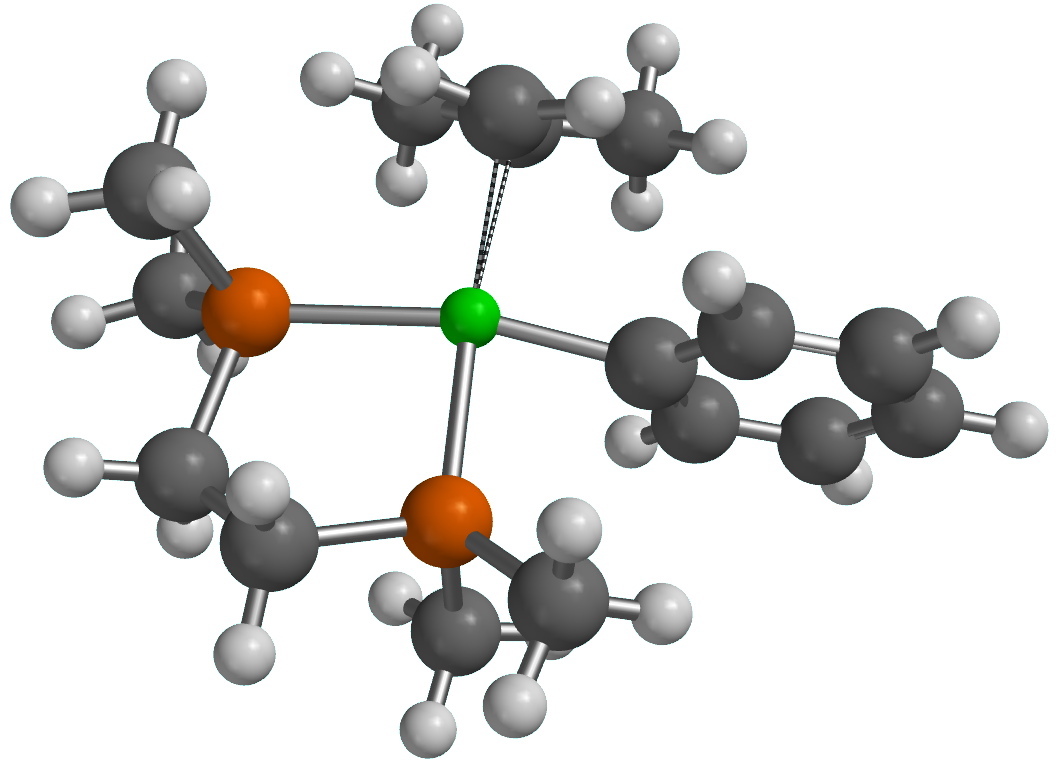


48

Ni -0.124498 0.164331 -0.243528

P -2.347766 0.398939 0.350669

P 0.329548 0.457836 1.877188

C -2.377962 0.663818 2.179059

H -2.481988 -0.327625 2.643161

H -3.272025 1.237115 2.458737

C -1.097714 1.333762 2.634733

H -0.991095 1.340631 3.728842

H -1.051687 2.379611 2.297585

C -3.168622 1.887480 -0.311312

H -2.551019 2.772703 -0.116083

H -4.151839 2.024032 0.155647

H -3.304050 1.795955 -1.395973

C -3.606773 -0.907380 0.154366

H -3.203794 -1.870912 0.488051

H -3.926001 -1.003263 -0.887727

H -4.484086 -0.659906 0.765719

C 1.780184 1.413813 2.394748

H 2.694099 0.841630 2.200827

H 1.707435 1.630380 3.467970

H 1.832707 2.357077 1.839252

C 0.457797 -1.098233 2.808466

H 1.359274 -1.638827 2.499488

H -0.412425 -1.737457 2.619735

H 0.522762 -0.882713 3.882765

C -0.241506 0.929836 -2.234176

H 0.724233 1.421033 -2.362005

H -1.117006 1.578371 -2.168599

C -0.382673 -0.401530 -2.543779

C 2.224394 -1.440419 -0.123765

C 4.054147 0.512659 -0.881976

C 3.566463 -1.779133 -0.315592

C 1.771632 -0.129994 -0.331730

C 2.711366 0.845030 -0.693288

C 4.486576 -0.802140 -0.696415

H 3.892604 -2.810369 -0.162851

H 2.399160 1.883017 -0.839919

H 5.536680 -1.061691 -0.841959

H 4.767380 1.286455 -1.175093

C 0.762889 -1.236799 -3.009101

H 1.727489 -0.728165 -2.926509

H 0.595422 -1.494573 -4.065581

H 0.817829 -2.192438 -2.468574

C -1.725601 -1.042092 -2.666966

H -1.833124 -1.901261 -1.988010

H -1.846801 -1.446974 -3.682226

H -2.542967 -0.336443 -2.487333

H 1.520955 -2.225177 0.173061

**[Ni(Ph)(DMPE)]+**


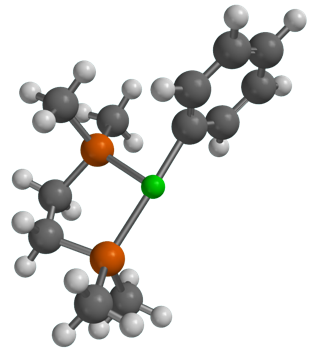


36

Ni -0.218416 -0.212965 -0.823579

P -2.418431 0.167074 -0.553331

P 0.178709 0.290379 1.186674

C -2.590724 0.298675 1.275917

H -2.660842 -0.725961 1.669102

H -3.527329 0.808972 1.539158

C -1.379893 1.017313 1.848002

H -1.353584 0.986275 2.946873

H -1.377078 2.078133 1.557981

C -3.003425 1.776973 -1.173018

H -2.353935 2.581050 -0.807293

H -4.032134 1.966865 -0.839896

H -2.975664 1.788267 -2.268861

C -3.710596 -1.002918 -1.065880

H -3.490857 -2.001986 -0.673004

H -3.747024 -1.059503 -2.159937

H -4.691481 -0.677553 -0.695803

C 1.471459 1.489270 1.590265

H 2.458273 1.049273 1.410235

H 1.385583 1.771988 2.647390

H 1.362235 2.385175 0.968677

C 0.518710 -1.165495 2.212106

H 1.477477 -1.608514 1.920376

H -0.269751 -1.915826 2.083486

H 0.564060 -0.867685 3.267819

C 2.132695 -1.798218 -0.909375

C 3.704854 0.218795 -2.032469

C 3.400482 -2.098356 -1.413026

C 1.623554 -0.492001 -0.997244

C 2.438874 0.521078 -1.528671

C 4.186196 -1.090798 -1.974665

H 3.778289 -3.121513 -1.359020

H 2.083053 1.554910 -1.565216

H 5.181044 -1.324011 -2.358270

H 4.321699 1.010409 -2.462976

H 1.533916 -2.597575 -0.462528

**[Ni(Ph)(H2O)(DMPE)]+**


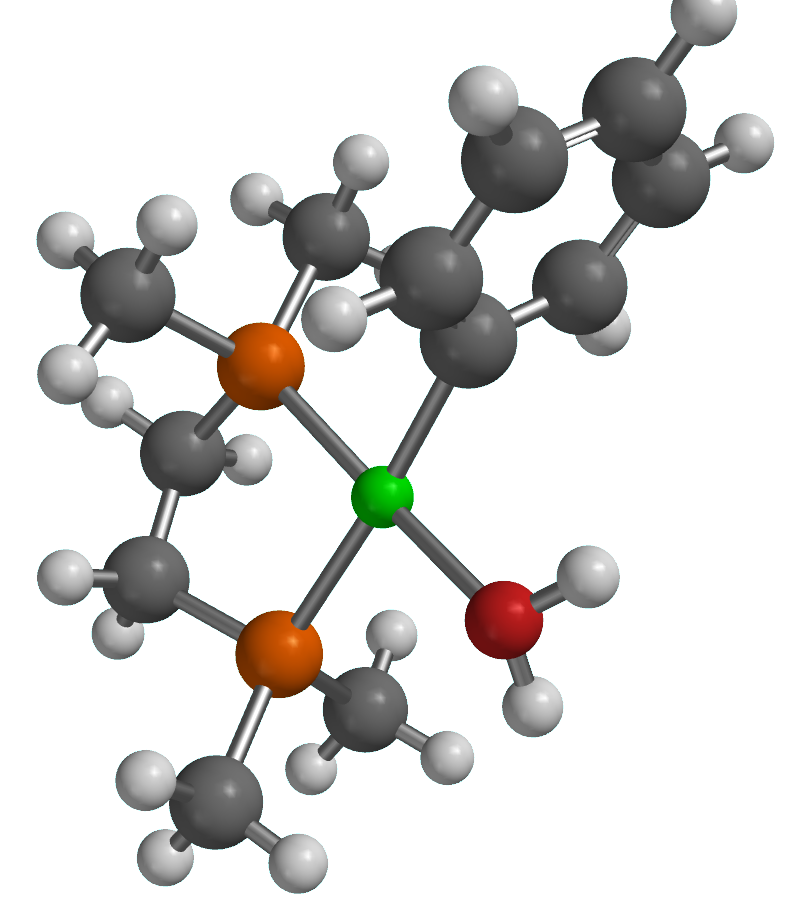


39

Ni -0.254402 -0.112793 -0.701729

P -2.418381 0.284936 -0.226533

P 0.190693 0.202596 1.357452

C -2.550316 0.288604 1.608450

H -2.643436 -0.759154 1.929234

H -3.461794 0.807928 1.934209

C -1.293896 0.920862 2.182969

H -1.215781 0.789477 3.271415

H -1.273562 2.003184 1.987909

C -3.003157 1.937900 -0.723616

H -2.348102 2.710435 -0.303719

H -4.029835 2.109381 -0.374257

H -2.979582 2.029398 -1.816297

C -3.721960 -0.839038 -0.810567

H -3.501916 -1.863884 -0.490436

H -3.760746 -0.820877 -1.906681

H -4.703036 -0.540302 -0.419206

C 1.561907 1.277239 1.858385

H 2.516681 0.807427 1.597160

H 1.523157 1.441588 2.942782

H 1.493368 2.243427 1.345519

C 0.490336 -1.361863 2.232557

H 1.405078 -1.829918 1.851083

H -0.346186 -2.052701 2.075551

H 0.604524 -1.173621 3.308025

C 2.180417 -1.673905 -0.893286

C 3.797297 0.452939 -1.677009

C 3.513753 -1.902302 -1.246090

C 1.629886 -0.383296 -0.930623

C 2.465338 0.676013 -1.319599

C 4.326760 -0.838171 -1.637957

H 3.918086 -2.916698 -1.213311

H 2.078282 1.699606 -1.344134

H 5.369303 -1.013581 -1.909840

H 4.426168 1.292864 -1.981571

H 1.563164 -2.525470 -0.589728

O -0.544078 -0.596118 -2.629908

H 0.246748 -0.574707 -3.184026

H -1.250781 -0.197404 -3.152580

**TS3-Ni**

**
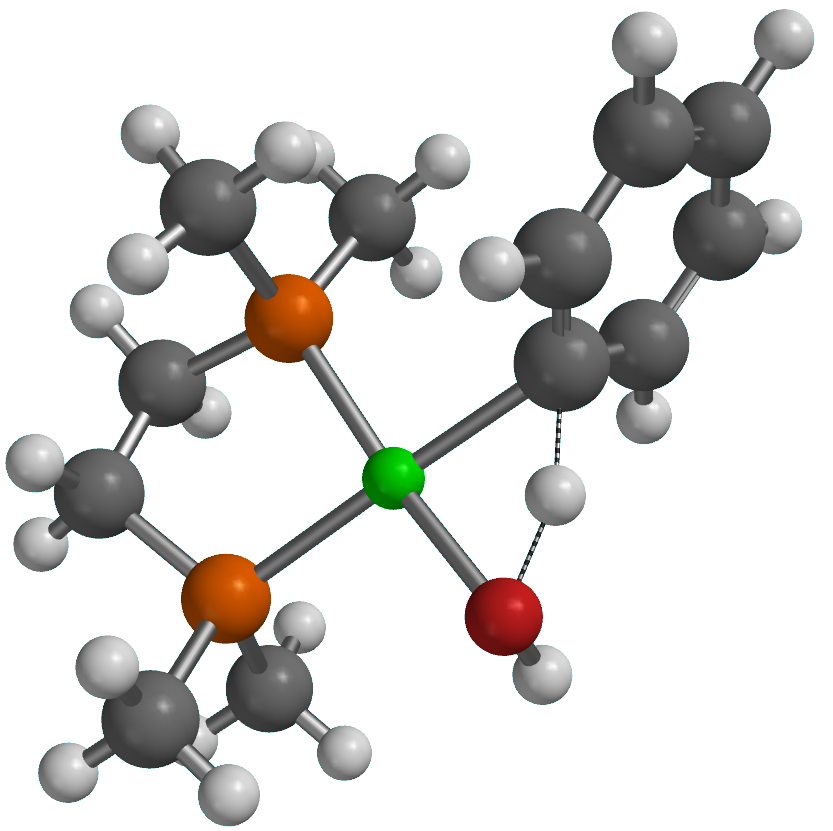
**

39

Ni -0.420152 -0.161478 -0.811024

P -2.469501 0.292551 -0.152937

P 0.175263 0.122283 1.255363

C -2.517845 0.350807 1.680323

H -2.654792 -0.679966 2.036428

H -3.382544 0.930515 2.029294

C -1.198516 0.926237 2.172217

H -1.060338 0.796229 3.254157

H -1.138175 2.004429 1.966328

C -2.992778 1.940377 -0.709673

H -2.305881 2.702882 -0.324574

H -4.008648 2.156708 -0.354049

H -2.980098 1.983576 -1.805046

C -3.771590 -0.840714 -0.695906

H -3.558830 -1.853350 -0.335808

H -3.804147 -0.857628 -1.791187

H -4.747640 -0.515621 -0.313582

C 1.667440 1.078370 1.623560

H 2.546007 0.549724 1.236284

H 1.771807 1.201697 2.708987

H 1.610692 2.064512 1.149396

C 0.422492 -1.477237 2.078357

H 1.263768 -2.004729 1.614442

H -0.474859 -2.098762 1.980908

H 0.640230 -1.320123 3.142664

C 2.142113 -1.676345 -1.085197

C 3.717052 0.571504 -1.590338

C 3.526539 -1.758017 -0.952776

C 1.513772 -0.469280 -1.452141

C 2.331466 0.649222 -1.710252

C 4.313774 -0.630922 -1.202619

H 3.996086 -2.699062 -0.661769

H 1.874563 1.594672 -2.015631

H 5.398587 -0.691648 -1.100649

H 4.335176 1.446518 -1.798325

H 1.535796 -2.567039 -0.898327

O -0.782477 -0.635965 -2.678720

H 0.449424 -0.579824 -2.284457

H -0.963237 0.154897 -3.203722

**[Ni(OH)(Ph-H)(DMPE)]+**

**
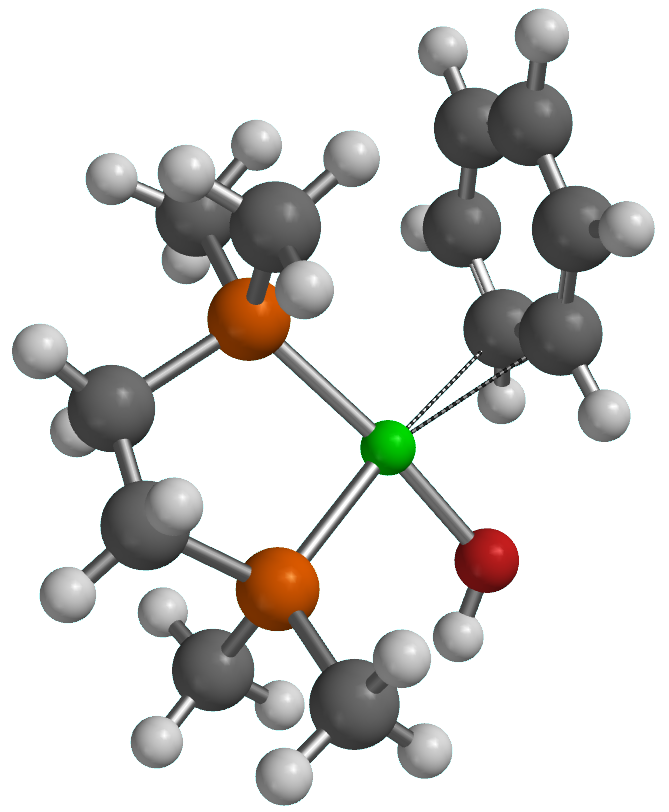
**

39

Ni -0.231162 0.125187 -0.969899

P -2.249095 0.445908 -0.253384

P 0.411373 0.200644 1.160614

C -2.291941 0.318195 1.572065

H -2.380661 -0.747654 1.825708

H -3.186484 0.821786 1.963088

C -1.001534 0.907025 2.106015

H -0.863408 0.716158 3.178938

H -0.975961 1.997373 1.965644

C -2.862926 2.108932 -0.635856

H -2.220187 2.862638 -0.166968

H -3.885948 2.217653 -0.251865

H -2.867554 2.281095 -1.717951

C -3.489214 -0.709158 -0.884345

H -3.183638 -1.738269 -0.665138

H -3.599208 -0.596608 -1.968076

H -4.454473 -0.507066 -0.401395

C 1.809720 1.231181 1.695266

H 2.765048 0.763146 1.442276

H 1.757048 1.361391 2.784044

H 1.758251 2.214268 1.213515

C 0.682154 -1.410131 1.962812

H 1.586103 -1.886758 1.571110

H -0.167997 -2.075131 1.769892

H 0.792229 -1.270144 3.045996

C 2.108642 -2.182849 -1.202698

C 3.035787 0.453474 -1.379513

C 3.264306 -1.801076 -0.533206

C 1.408364 -1.251079 -1.984119

C 1.872012 0.077883 -2.070032

C 3.730468 -0.482545 -0.624864

H 3.815339 -2.530310 0.063092

H 1.392176 0.777112 -2.754767

H 4.641621 -0.191678 -0.099433

H 3.400864 1.478845 -1.455622

H 1.753425 -3.212660 -1.143377

O -0.897537 0.191536 -2.704241

H 0.570038 -1.574527 -2.600295

H -1.746040 0.616214 -2.853032

***Cis-*5a’**


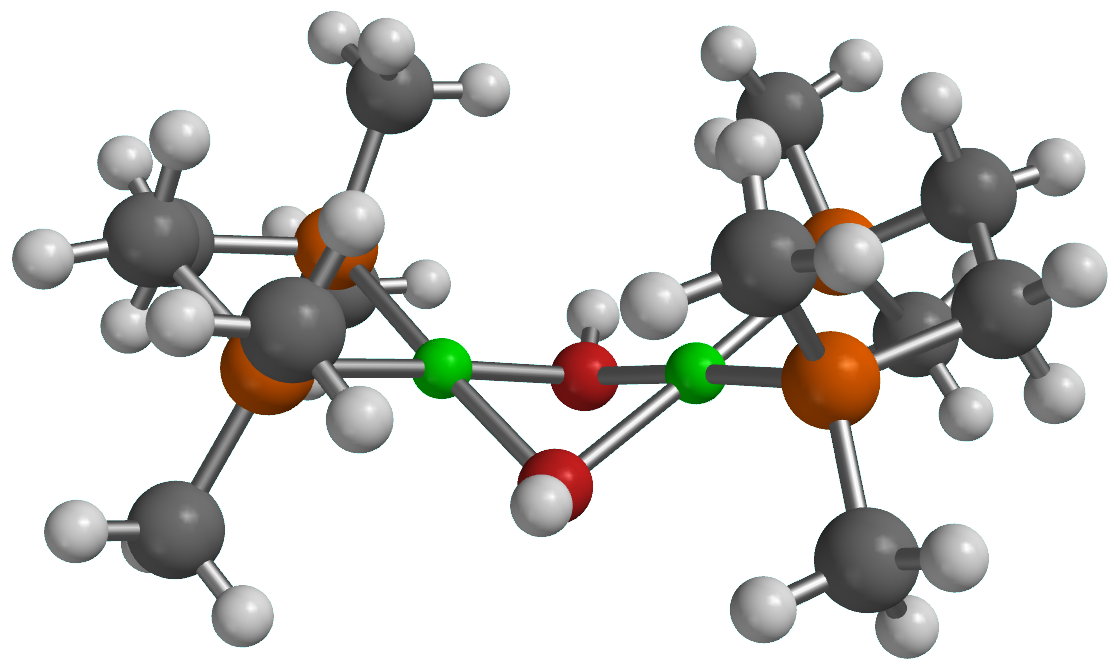


54

Ni -0.005464 0.796250 1.324025

P -1.497596 0.073199 2.726462

P 1.489903 0.091320 2.729216

C -0.675707 -0.918513 4.034238

H -0.568792 -1.940944 3.644713

H -1.313772 -0.977691 4.926107

C 0.680919 -0.300872 4.326785

H 1.321522 -0.955758 4.932455

H 0.574895 0.646333 4.874772

C -2.343373 1.433972 3.576722

H -1.618729 2.042919 4.129198

H -3.089140 1.034742 4.276574

H -2.844982 2.073686 2.841097

C -2.814808 -0.974383 2.054403

H -2.379199 -1.834270 1.533184

H -3.435989 -0.406120 1.352471

H -3.453091 -1.333322 2.872181

C 2.858845 1.216513 3.097735

H 3.441281 1.412068 2.190201

H 3.518111 0.766319 3.851234

H 2.469241 2.166832 3.479050

C 2.261061 -1.449193 2.158742

H 2.797029 -1.265178 1.220624

H 1.494106 -2.210929 1.976218

H 2.970794 -1.820675 2.909353

O -1.221644 1.475150 -0.004123

H -2.133653 1.168450 -0.010183

O 1.219881 1.475766 0.003792

H 2.132082 1.169639 0.009979

Ni 0.004108 0.795771 -1.324133

P -1.490163 0.090683 -2.730405

P 1.497310 0.072550 -2.725365

C 2.812390 -0.976876 -2.051978

H 3.452233 -1.335141 -2.868836

H 2.374978 -1.837186 -1.532953

H 3.432394 -0.410100 -1.347796

C 2.345683 1.433160 -3.573270

H 3.092133 1.033754 -4.272294

H 2.846766 2.071861 -2.836408

H 1.622419 2.043162 -4.126386

C 0.676308 -0.917366 -4.035061

H 1.315102 -0.975618 -4.926464

H 0.568817 -1.940240 -3.646859

C -2.260067 -1.451370 -2.162422

H -1.492402 -2.212390 -1.979901

H -2.968524 -1.822867 -2.914229

H -2.797303 -1.269071 -1.224716

C -0.679952 -0.299068 -4.327933

H -0.573317 0.648944 -4.874401

H -1.320120 -0.952991 -4.935108

C -2.859976 1.214990 -3.098353

H -3.518472 0.765012 -3.852651

H -2.471065 2.166086 -3.478436

H -3.443009 1.409000 -2.190871

***Trans-*5a'**

**
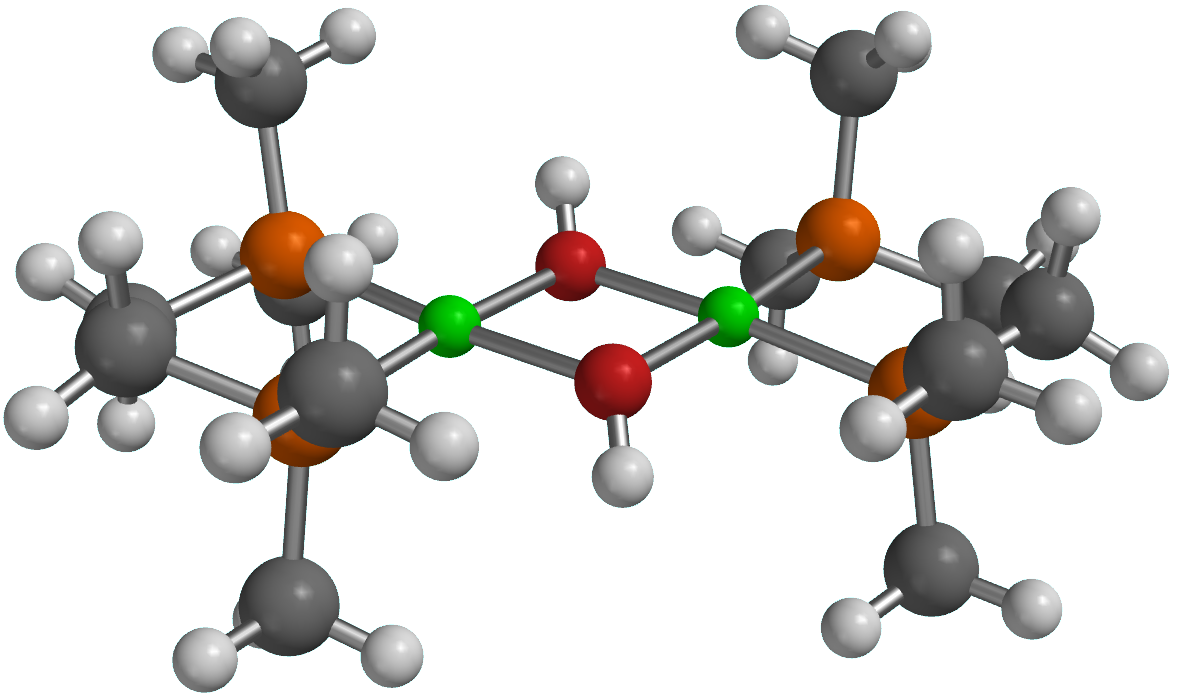
**

54

H 1.901327 3.373530 1.094023

H -1.941848 3.363304 1.054483

H -0.004802 2.048810 -0.405584

O -0.005922 1.260136 0.146203

C 4.637696 -0.651033 -0.331114

C 4.629389 0.687116 0.390084

C 2.815220 2.805869 1.302535

C 3.201322 2.354112 -1.526089

C 3.204547 -2.324451 1.575315

C 2.850356 -2.786981 -1.255652

H 4.727037 -0.513846 -1.418182

H 5.469803 -1.294874 -0.016135

H 4.710414 0.550583 1.477890

H 5.459137 1.337442 0.082338

H 4.006913 3.097634 -1.464810

H 4.016602 -3.061674 1.523996

Ni 1.450233 0.005707 0.012573

P 3.017180 1.501204 0.065383

P 3.029246 -1.477355 -0.020247

C -4.638195 0.651030 0.329163

C -4.628863 -0.687214 -0.391846

C -2.812916 -2.805339 -1.302307

C -3.203437 -2.354712 1.525889

C -3.202390 2.323334 -1.576193

C -2.852697 2.787924 1.254984

H -4.728920 0.513994 1.416135

H -5.469932 1.294780 0.013015

H -4.708505 -0.550824 -1.479771

H -5.458964 -1.337553 -0.085090

H -4.008833 -3.098319 1.463091

H -4.014567 3.060544 -1.526618

Ni -1.450249 -0.005584 -0.008932

P -3.017003 -1.501175 -0.064982

P -3.029414 1.477385 0.020229

H -1.899160 -3.372789 -1.092640

H 1.939593 -3.362163 -1.054207

H 0.004760 -2.047093 0.415504

O 0.005882 -1.260506 -0.139253

H -2.778451 2.348851 2.256074

H -3.717908 3.462256 1.216639

H -3.440076 -1.632354 2.315584

H -2.267732 -2.862329 1.788360

H 3.426216 -1.597860 2.365464

H 2.270038 -2.838839 1.828710

H 3.715408 -3.461610 -1.219015

H 2.774814 -2.347185 -2.256329

H 3.436641 1.631423 -2.315875

H 2.265273 2.861736 -1.787319

H 3.674547 3.488236 1.275812

H 2.734165 2.362720 2.301306

H -2.267522 2.837580 -1.828549

H -3.422818 1.596176 -2.366168

H -2.730534 -2.361811 -2.300803

H -3.672100 -3.487942 -1.277071

**[Ni(CH2CMe2Ph)(PMe3)(DMPE)]+**

**
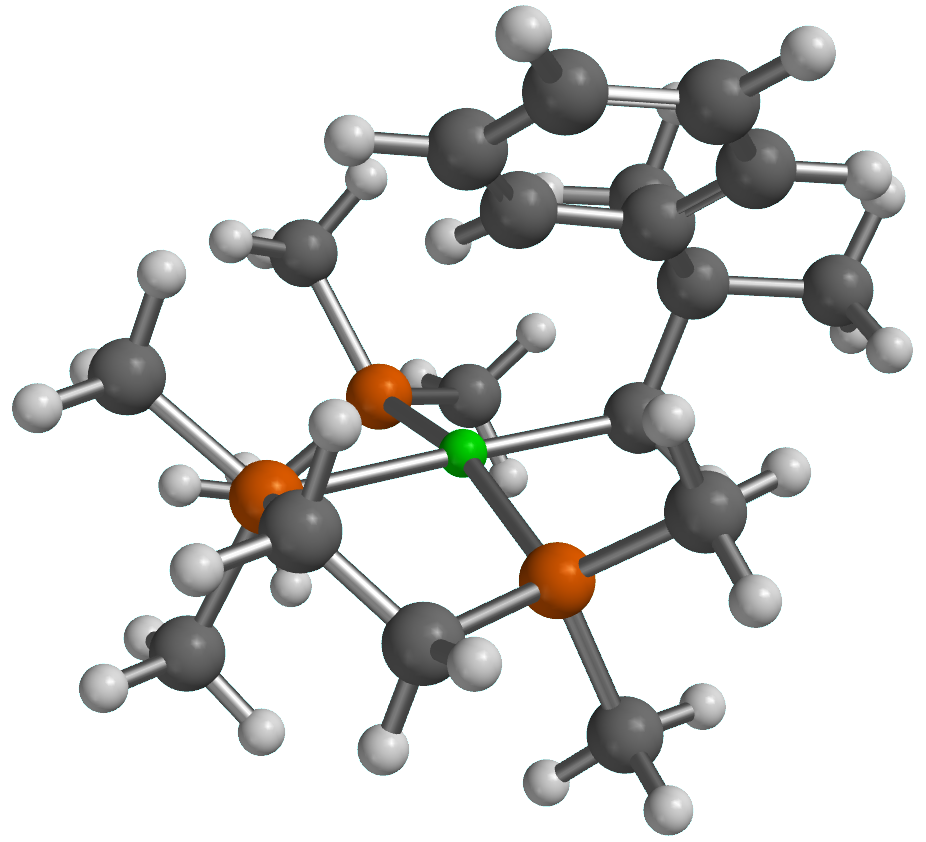
**

61

Ni -0.078611 -0.676721 0.290054

P 2.130653 -0.614505 0.384853

P 0.015884 -0.132083 2.475232

C 2.697505 -0.051361 2.054579

H 3.644670 0.496036 1.965731

H 2.899980 -0.940761 2.667239

C 1.596730 0.791324 2.674793

H 1.491329 1.750586 2.146418

H 1.782482 1.014540 3.734959

C 2.905539 -2.244483 0.153566

H 2.486373 -2.961686 0.868876

H 3.991120 -2.179256 0.303242

H 2.710232 -2.611097 -0.860917

C 3.061158 0.469262 -0.741063

H 2.817325 1.516667 -0.526684

H 2.811846 0.259627 -1.786828

H 4.137073 0.312793 -0.592043

C 0.243817 -1.502961 3.663083

H -0.700931 -2.024676 3.842541

H 0.616235 -1.115506 4.620434

H 0.960766 -2.232912 3.269461

C -1.221945 0.931498 3.285644

H -1.410309 1.823996 2.677598

H -0.863783 1.242735 4.275131

H -2.167988 0.392708 3.414426

C 0.135096 -0.968349 -1.693913

H -0.500310 -1.805371 -2.018943

H 1.160119 -1.295818 -1.924066

C -0.179635 0.258638 -2.592113

C 0.248382 1.574640 -1.940363

C 0.989533 3.977868 -0.640645

C -0.275368 1.920842 -0.684026

C 1.118607 2.486755 -2.545090

C 1.488266 3.672824 -1.904814

C 0.092437 3.096135 -0.034326

H -1.023409 1.267203 -0.216777

H 2.179343 4.357568 -2.399852

H -0.330743 3.330656 0.944121

H 1.282718 4.899878 -0.136448

C -1.683125 0.355401 -2.871118

H -2.271276 0.435078 -1.949920

H -2.031565 -0.527816 -3.422838

H -1.913096 1.239567 -3.480624

C 0.519088 0.040372 -3.935719

H 0.210457 -0.923523 -4.359495

H 1.612344 0.019676 -3.833090

H 0.262020 0.819086 -4.667695

H 1.539945 2.270646 -3.527139

P -2.199670 -1.400767 0.338939

C -2.557300 -2.467269 1.781758

H -3.546534 -2.929346 1.670149

H -2.563396 -1.872116 2.701862

H -1.803906 -3.257535 1.878440

C -2.808250 -2.456480 -1.018892

H -3.827878 -2.794863 -0.796103

H -2.813663 -1.916881 -1.970230

H -2.158774 -3.333761 -1.124690

C -3.519819 -0.144761 0.500621

H -3.567472 0.495133 -0.386979

H -3.326750 0.496553 1.368026

H -4.493566 -0.633628 0.631670

**IV’**


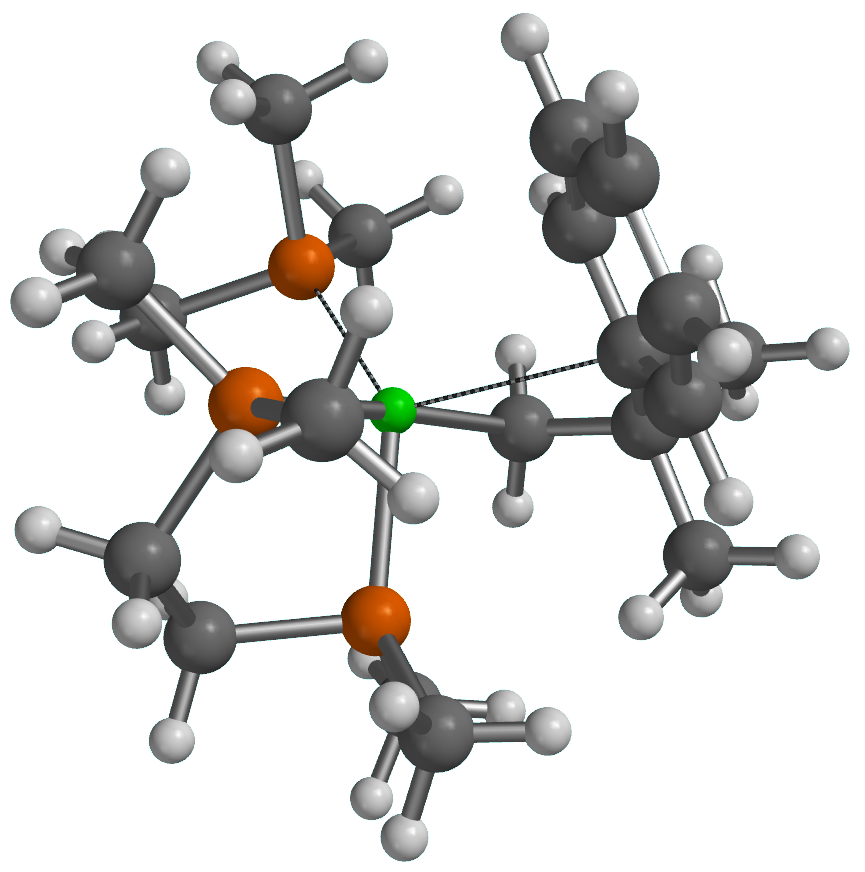


61

Ni -0.058517 -0.446326 0.046757

P 2.108273 -0.940403 -0.042220

P 0.486914 0.390046 2.093241

C 2.352672 -1.648458 1.641280

H 3.398089 -1.960000 1.779766

H 1.735881 -2.556424 1.686856

C 1.910608 -0.645498 2.699361

H 2.731568 0.031080 2.973429

H 1.604847 -1.152272 3.623584

C 2.649426 -2.285332 -1.143278

H 1.959024 -3.132412 -1.054653

H 3.660761 -2.612842 -0.871870

H 2.654384 -1.953210 -2.187765

C 3.496949 0.250970 -0.139219

H 3.448574 0.958158 0.696433

H 3.474666 0.827942 -1.069710

H 4.451564 -0.287735 -0.079862

C -0.588302 0.523505 3.567030

H -1.348336 1.296235 3.400976

H 0.020353 0.821142 4.430431

H -1.089492 -0.421210 3.802922

C 1.152765 2.090694 2.055775

H 1.806745 2.250674 1.193085

H 1.707796 2.298530 2.979709

H 0.321407 2.799379 1.977212

C -0.347015 -0.982307 -1.850602

H -1.374175 -1.333944 -1.985779

H 0.310447 -1.786009 -2.206714

C -0.139080 0.315561 -2.656649

C -0.419055 1.503623 -1.730693

C -1.123383 3.724742 -0.130366

C -1.654892 1.558105 -1.056767

C 0.457732 2.585954 -1.568872

C 0.107276 3.685515 -0.785300

C -2.002854 2.650606 -0.263106

H 0.806870 4.517226 -0.682657

H -2.972485 2.669782 0.238054

H -1.394966 4.586321 0.481787

C -1.144694 0.358480 -3.817328

H -2.180384 0.316097 -3.456487

H -0.989677 -0.498931 -4.487009

H -1.029427 1.276545 -4.411447

C 1.260204 0.369718 -3.253761

H 1.427303 -0.507344 -3.891103

H 2.045537 0.382949 -2.490743

H 1.402460 1.260693 -3.879422

H 1.425487 2.582873 -2.072007

P -1.946367 -1.436489 0.710675

C -1.543819 -2.723238 1.946994

H -2.455917 -3.183053 2.349788

H -0.956669 -2.314517 2.776828

H -0.940877 -3.501897 1.463990

C -2.947326 -2.393718 -0.478753

H -3.765747 -2.898748 0.049258

H -3.379806 -1.729624 -1.237426

H -2.332164 -3.145715 -0.986117

C -3.257856 -0.446489 1.511856

H -3.739838 0.184375 0.755199

H -2.857939 0.207841 2.290610

H -4.019091 -1.103712 1.952059

H -2.376431 0.752498 -1.207259

**TS4**


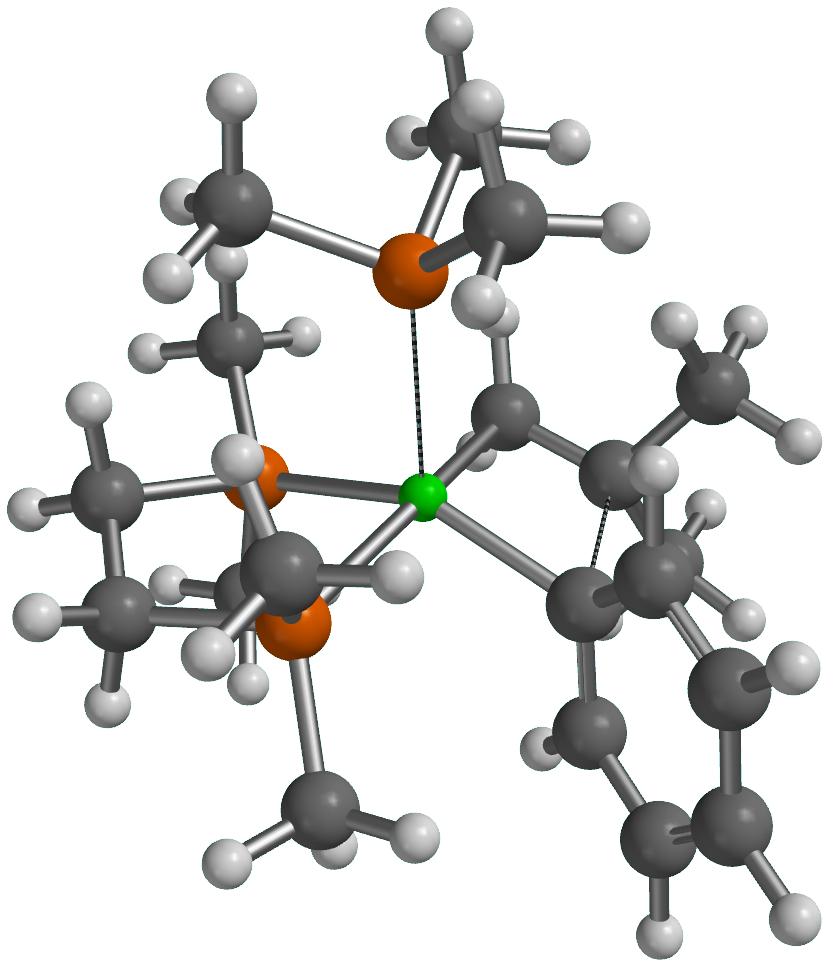


61

Ni 0.350220 -0.116466 -0.290616

P 2.006440 -1.471328 0.154235

P 0.728185 0.734539 1.753633

C 2.157065 -1.650834 1.980062

H 3.109353 -2.133941 2.241479

H 1.355172 -2.330153 2.298501

C 2.009194 -0.285705 2.626973

H 2.950331 0.276113 2.545526

H 1.776872 -0.352537 3.698266

C 2.026304 -3.180530 -0.468228

H 1.121048 -3.712020 -0.152511

H 2.904426 -3.717786 -0.088171

H 2.062361 -3.180187 -1.563790

C 3.624746 -0.812245 -0.368969

H 3.786803 0.176193 0.078093

H 3.640820 -0.696308 -1.459520

H 4.442322 -1.481892 -0.070284

C -0.714642 0.788709 2.870973

H -1.504890 1.386124 2.398349

H -0.443910 1.254739 3.826977

H -1.106153 -0.213979 3.066859

C 1.382273 2.421203 1.973426

H 2.237142 2.597927 1.310448

H 1.702806 2.548088 3.015655

H 0.605329 3.159723 1.748251

C 0.405717 -0.880762 -2.109367

H -0.183676 -1.799215 -2.141860

H 1.409376 -1.001124 -2.527233

C -0.257011 0.362205 -2.418744

C -0.356736 1.709970 -0.853678

C -1.033047 4.419416 -0.380345

C -1.651358 2.080491 -0.452308

C 0.584008 2.741089 -1.021127

C 0.254915 4.075161 -0.793751

C -1.983299 3.411840 -0.202877

H 1.013022 4.849305 -0.930866

H -2.994825 3.662492 0.123672

H -1.296206 5.463500 -0.203016

C -1.728339 0.265777 -2.736260

H -2.298644 -0.237474 -1.949215

H -1.845449 -0.322145 -3.658064

H -2.179783 1.249906 -2.904771

C 0.497288 1.226056 -3.401022

H 0.432041 0.733857 -4.382649

H 1.561036 1.309048 -3.152994

H 0.074268 2.231861 -3.500518

H 1.602852 2.497133 -1.331376

P -1.652130 -1.621653 0.409233

C -1.330002 -2.758059 1.821664

H -2.216013 -3.369724 2.038959

H -1.049165 -2.219591 2.733842

H -0.505155 -3.434355 1.564831

C -2.111573 -2.895419 -0.835890

H -2.899459 -3.552772 -0.445245

H -2.470971 -2.437608 -1.765189

H -1.237087 -3.511600 -1.080226

C -3.323305 -0.995288 0.854878

H -3.785360 -0.512641 -0.016138

H -3.258870 -0.249367 1.656225

H -3.979552 -1.812474 1.183850

H -2.417128 1.314721 -0.318041

**13’**


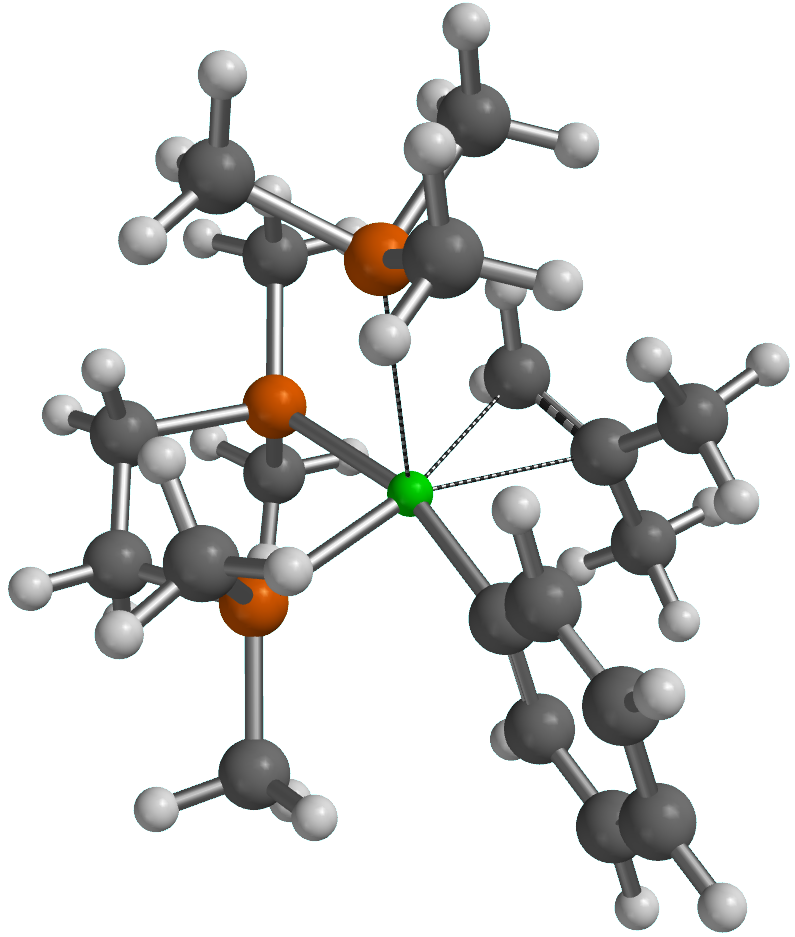


61

Ni 0.588196 0.160095 -0.376808

P 1.990150 -1.505725 0.152133

P 0.981609 0.883989 1.656426

C 2.190095 -1.559724 1.977181

H 3.060283 -2.169671 2.256120

H 1.297341 -2.053711 2.388322

C 2.296377 -0.130066 2.466704

H 3.265343 0.310522 2.192721

H 2.202477 -0.043525 3.557914

C 1.718324 -3.237598 -0.329217

H 0.745705 -3.587087 0.034460

H 2.503253 -3.872695 0.099710

H 1.741434 -3.342850 -1.419549

C 3.671928 -1.153946 -0.458359

H 3.989451 -0.154985 -0.137322

H 3.684092 -1.175475 -1.554622

H 4.386952 -1.897603 -0.083039

C -0.441625 0.656754 2.769157

H -1.343348 1.107078 2.340497

H -0.227781 1.128811 3.736632

H -0.619696 -0.411579 2.930793

C 1.513492 2.588120 1.997470

H 2.311600 2.890425 1.310208

H 1.887274 2.640542 3.027892

H 0.671806 3.279288 1.883595

C 0.546934 -0.930907 -2.205798

H -0.119217 -1.768603 -1.995393

H 1.569405 -1.189716 -2.485912

C 0.028724 0.274390 -2.634880

C -0.310148 1.898466 -0.459983

C -1.586441 4.424491 -0.587038

C -1.656215 2.055101 -0.098087

C 0.384208 3.048887 -0.864123

C -0.242224 4.293315 -0.940753

C -2.290717 3.297927 -0.160635

H 0.325830 5.167124 -1.268444

H -3.342523 3.382933 0.121819

H -2.079062 5.397183 -0.639255

C -1.444947 0.455426 -2.814241

H -2.028214 -0.117316 -2.083340

H -1.721338 0.098173 -3.818540

H -1.745888 1.507341 -2.752084

C 0.907606 1.235964 -3.367750

H 0.840376 1.016152 -4.444927

H 1.961346 1.146325 -3.077425

H 0.588851 2.276304 -3.241287

H 1.444240 2.978275 -1.125150

P -1.758120 -1.744125 0.478217

C -1.585151 -2.927457 1.881912

H -2.454380 -3.596537 1.949475

H -1.494768 -2.388247 2.833188

H -0.684581 -3.542824 1.763010

C -2.214990 -2.932377 -0.854068

H -3.050588 -3.576814 -0.548533

H -2.508161 -2.392036 -1.763509

H -1.360887 -3.572962 -1.109643

C -3.426320 -1.065571 0.860353

H -3.802815 -0.494066 0.001806

H -3.374575 -0.385251 1.720478

H -4.145300 -1.864515 1.088267

H -2.234679 1.186160 0.223251

**TS5**


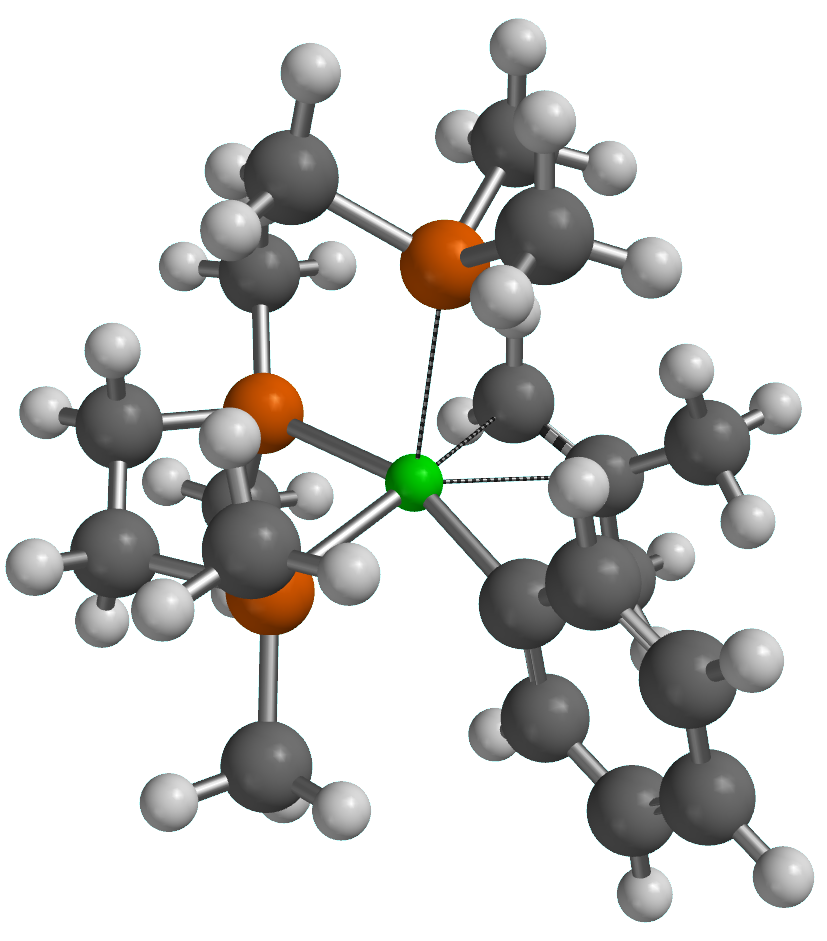


61

Ni 0.423242 0.054439 -0.210237

P 1.964903 -1.521003 0.199591

P 1.020585 0.881732 1.713971

C 2.229197 -1.593859 2.014782

H 3.123418 -2.183923 2.258571

H 1.365634 -2.108429 2.458499

C 2.326404 -0.164180 2.510538

H 3.295174 0.275251 2.235156

H 2.241623 -0.085214 3.602750

C 1.845327 -3.257902 -0.337050

H 0.960391 -3.740630 0.090976

H 2.736236 -3.814427 -0.020284

H 1.772756 -3.310373 -1.429527

C 3.603653 -1.024447 -0.435190

H 3.839040 -0.000236 -0.123476

H 3.607552 -1.050650 -1.530988

H 4.385519 -1.702121 -0.067796

C -0.346560 0.851059 2.916959

H -1.171147 1.478914 2.561522

H 0.001173 1.229272 3.886798

H -0.715468 -0.171103 3.048661

C 1.701325 2.555383 1.931548

H 2.493675 2.748089 1.199162

H 2.123331 2.635569 2.941531

H 0.916264 3.308370 1.809446

C 0.552949 -0.863370 -2.308017

H -0.112389 -1.704959 -2.130688

H 1.605862 -1.098295 -2.464287

C 0.072237 0.324354 -2.781340

C -0.420640 1.825736 -0.323642

C -1.581872 4.395444 -0.658438

C -1.755886 2.078243 0.023493

C 0.325171 2.914333 -0.805644

C -0.243616 4.175566 -0.989191

C -2.334020 3.339640 -0.141898

H 0.366941 4.993276 -1.378807

H -3.379252 3.495243 0.134089

H -2.029635 5.381987 -0.791268

C -1.387472 0.574142 -2.957613

H -2.002073 -0.044211 -2.293554

H -1.666552 0.338902 -3.996508

H -1.645342 1.627700 -2.795145

C 0.996285 1.309683 -3.413104

H 0.987066 1.140625 -4.501317

H 2.030831 1.195522 -3.069838

H 0.674381 2.345716 -3.262635

H 1.384246 2.778568 -1.041284

P -1.625780 -1.556229 0.331425

C -1.383791 -2.681238 1.767833

H -2.228645 -3.377074 1.859514

H -1.304440 -2.116842 2.703709

H -0.467717 -3.271552 1.654312

C -2.009453 -2.816850 -0.951900

H -2.799538 -3.494954 -0.603652

H -2.348773 -2.337626 -1.878782

H -1.121224 -3.416323 -1.187225

C -3.332503 -0.982670 0.703051

H -3.738904 -0.412394 -0.141407

H -3.335388 -0.332903 1.587212

H -3.994018 -1.837372 0.898340

H -2.372650 1.277330 0.427006

**[Ni(Ph)(PMe3)(DMPE)]+**


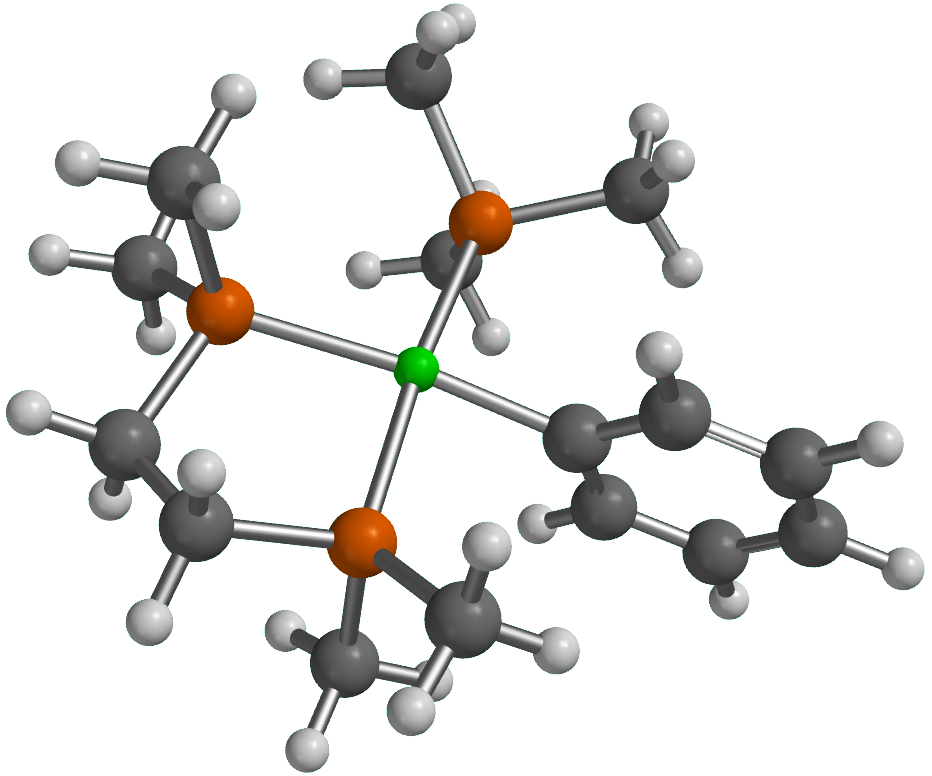


49

Ni -0.124489 0.001258 -0.121940

P -2.250233 0.529668 -0.582396

P 0.337834 2.127193 -0.409819

C -2.374632 2.372068 -0.632986

H -2.521026 2.711533 0.402931

H -3.268007 2.674348 -1.196706

C -1.098508 2.952350 -1.214961

H -1.037473 4.042362 -1.089442

H -1.027207 2.746789 -2.293089

C -2.788495 0.027299 -2.250836

H -2.090994 0.424001 -2.998269

H -3.795229 0.410477 -2.462616

H -2.796042 -1.064613 -2.340190

C -3.638521 0.062544 0.500219

H -3.432421 0.394689 1.524552

H -3.784949 -1.022851 0.513322

H -4.565499 0.535695 0.151881

C 1.791003 2.650904 -1.360962

H 2.702883 2.363555 -0.824692

H 1.779623 3.739798 -1.495794

H 1.796864 2.165752 -2.343771

C 0.515222 2.988825 1.183367

H 1.392161 2.600721 1.714594

H -0.369247 2.821389 1.809224

H 0.643018 4.066934 1.021498

C 2.228174 -0.089401 1.575158

C 4.028526 -0.751238 -0.437257

C 3.576470 -0.292097 1.883611

C 1.749994 -0.220445 0.261464

C 2.680494 -0.549124 -0.737913

C 4.483508 -0.626339 0.877308

H 3.917981 -0.188845 2.916316

H 2.352145 -0.655078 -1.776772

H 5.537108 -0.785645 1.114299

H 4.729225 -1.009256 -1.235093

H 1.538208 0.170398 2.384751

P -0.412113 -2.154969 0.361635

C 1.024177 -3.265184 0.209818

H 1.397939 -3.260645 -0.821003

H 0.734411 -4.288191 0.481535

H 1.833640 -2.930956 0.868413

C -1.697467 -3.096987 -0.528030

H -1.461356 -3.128768 -1.598469

H -2.683509 -2.636563 -0.405270

H -1.744121 -4.125501 -0.147745

C -0.882349 -2.334187 2.113557

H -0.104095 -1.895032 2.749437

H -0.996005 -3.394586 2.374881

H -1.826618 -1.814049 2.312254

**6’**


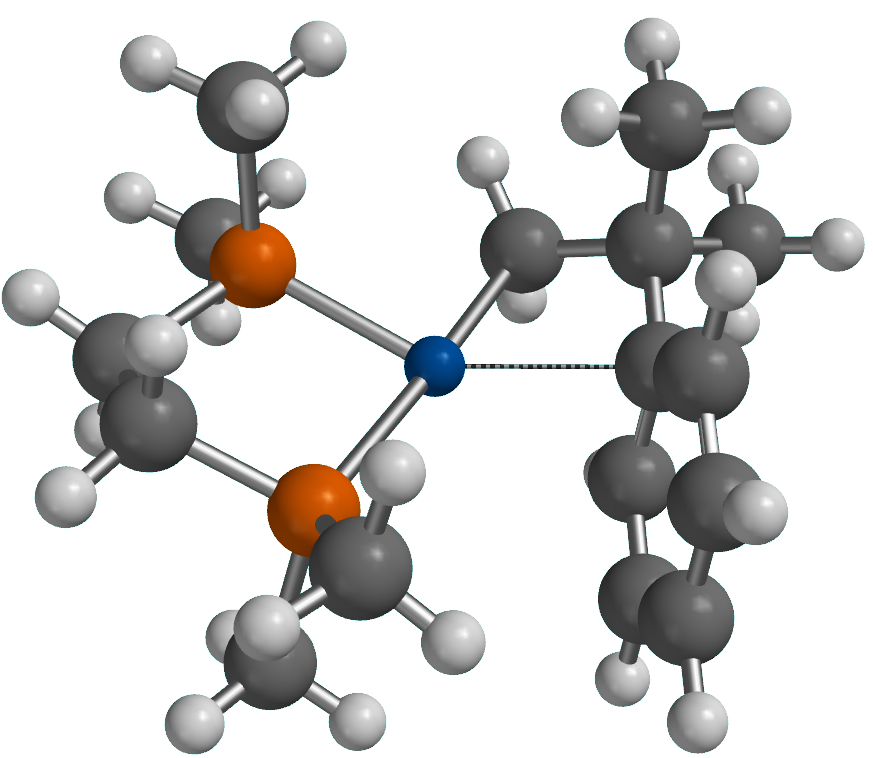


48

Pd -0.262932 0.295476 -0.124545

P -1.517762 0.968774 1.621674

P -1.230249 -1.879080 0.214666

C -2.718109 -0.369127 2.013046

H -3.564343 -0.246634 1.321040

H -3.113143 -0.217948 3.027872

C -2.076538 -1.737498 1.850450

H -2.816050 -2.542477 1.965390

H -1.307857 -1.900574 2.620451

C -0.297209 -3.436204 0.354285

H 0.098174 -3.723949 -0.626450

H -0.948431 -4.241034 0.720235

H 0.545520 -3.311099 1.044178

C -2.581558 -2.297776 -0.936289

H -2.172084 -2.462435 -1.940356

H -3.298793 -1.470304 -0.994010

H -3.107177 -3.205689 -0.611767

C -0.532723 1.197706 3.129892

H 0.193920 2.004164 2.976608

H 0.015139 0.278742 3.367962

H -1.186869 1.457182 3.972803

C -2.498951 2.483409 1.469928

H -3.169773 2.411992 0.606665

H -1.833792 3.343032 1.329785

H -3.093923 2.638469 2.379571

C 0.550284 2.204712 -0.347266

H 0.559360 2.840424 0.546131

H -0.031811 2.699727 -1.138656

C 0.771485 0.190409 -2.409149

C 2.306345 -1.993270 -1.625097

C 0.578675 -1.057684 -3.017334

C 1.751223 0.370815 -1.401596

C 2.495982 -0.760511 -1.009238

C 1.350886 -2.147600 -2.633610

H -0.173328 -1.161501 -3.800953

H 3.247404 -0.668360 -0.225275

H 1.205886 -3.119041 -3.108478

H 2.907460 -2.847693 -1.309668

C 1.951211 1.775842 -0.800002

C 2.885526 1.740530 0.403626

H 2.507387 1.074514 1.192206

H 2.972718 2.746333 0.831964

H 3.897130 1.410467 0.134137

C 2.520976 2.717916 -1.862446

H 3.513693 2.383817 -2.196904

H 2.625219 3.732918 -1.455677

H 1.868314 2.776595 -2.742580

H 0.213489 1.053523 -2.777214

**[Pd(Ph)(h2-CH2=CMe2-∥)(DMPE)]+**


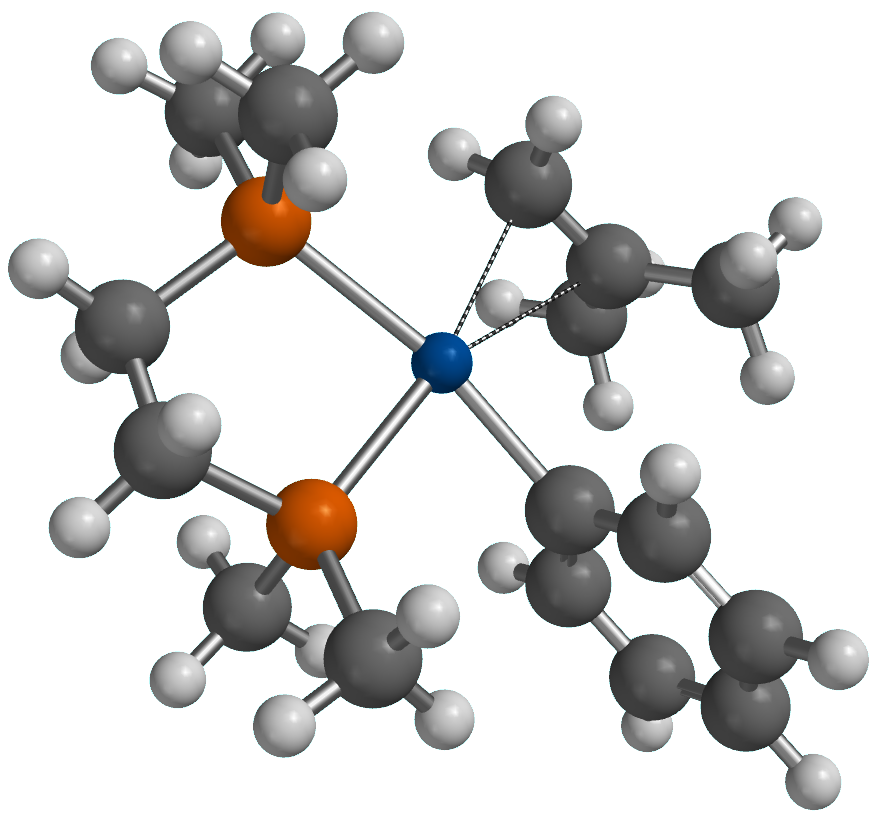


48

Pd -0.034650 0.385579 0.229374

P -1.603512 0.985798 1.928894

P -1.188724 -1.583093 0.151685

C -2.926596 -0.293625 1.882089

H -3.629116 -0.006206 1.086366

H -3.490891 -0.286432 2.825003

C -2.317189 -1.654665 1.603803

H -3.083163 -2.422081 1.423002

H -1.715163 -2.000580 2.456764

C -0.326441 -3.175815 0.157618

H 0.201640 -3.317337 -0.791921

H -1.058559 -3.982795 0.289837

H 0.402459 -3.211045 0.975227

C -2.280387 -1.653511 -1.296384

H -1.678710 -1.659879 -2.212380

H -2.943594 -0.781336 -1.319022

H -2.886377 -2.568283 -1.260254

C -0.893196 0.827271 3.598052

H -0.109691 1.580430 3.742435

H -0.440584 -0.163403 3.723217

H -1.668048 0.967505 4.363159

C -2.494390 2.568644 1.980834

H -2.978569 2.764425 1.017233

H -1.793930 3.384783 2.193128

H -3.256929 2.549652 2.769887

C 0.765254 2.531824 0.589261

H 1.221862 2.452672 1.578535

H -0.144600 3.128140 0.514918

C 0.957723 -0.670255 -2.485981

C 3.170033 -2.004451 -1.448565

C 1.819677 -1.366137 -3.340260

C 1.196202 -0.620028 -1.108313

C 2.304870 -1.311349 -0.600497

C 2.929611 -2.034173 -2.823944

H 1.617613 -1.386964 -4.413613

H 2.509868 -1.308378 0.474264

H 3.601742 -2.579923 -3.488645

H 4.033632 -2.528019 -1.032032

C 1.501790 2.275525 -0.541430

C 2.934402 1.863339 -0.466899

H 3.186991 1.377102 0.481647

H 3.554796 2.768635 -0.555245

H 3.220268 1.204397 -1.295557

C 1.008957 2.686458 -1.888830

H 1.206158 1.914974 -2.644617

H 1.564779 3.579418 -2.214352

H -0.059058 2.930585 -1.892692

H 0.091740 -0.157394 -2.914801

**TS2-Pd**

**
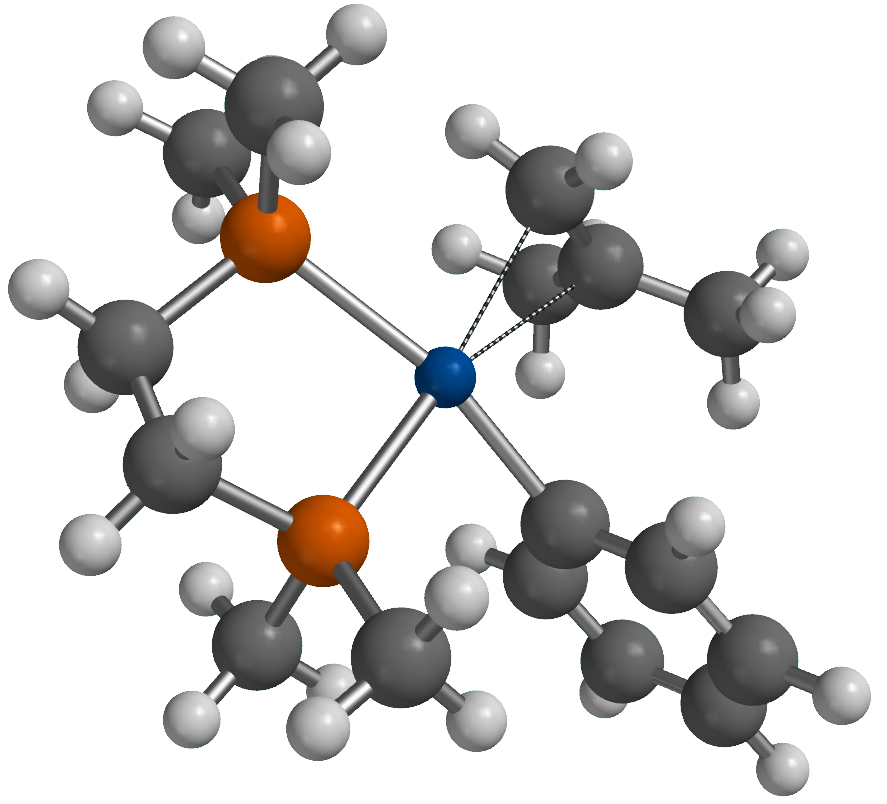
**

48

Pd 0.049448 0.249210 0.341507

P -1.657211 0.992202 1.835568

P -1.106866 -1.711161 0.276908

C -2.982399 -0.283905 1.734041

H -3.581319 -0.051283 0.841216

H -3.655346 -0.206467 2.599067

C -2.363160 -1.664469 1.623063

H -3.116109 -2.444124 1.439382

H -1.840741 -1.938150 2.551678

C -0.190972 -3.248582 0.559790

H 0.443469 -3.470866 -0.304836

H -0.899800 -4.073035 0.710169

H 0.443057 -3.152963 1.448664

C -2.047751 -1.999271 -1.246962

H -1.358479 -2.092300 -2.093737

H -2.729629 -1.163178 -1.440085

H -2.629126 -2.925608 -1.151644

C -1.249554 1.104710 3.605805

H -0.474446 1.865151 3.759577

H -0.863373 0.143624 3.965207

H -2.137427 1.377007 4.191314

C -2.512937 2.556263 1.474895

H -2.833366 2.573777 0.426586

H -1.843464 3.407004 1.647943

H -3.392956 2.670333 2.121060

C 1.171569 2.209535 0.998324

H 1.801116 1.837899 1.810721

H 0.344066 2.860028 1.279668

C 0.875191 -0.478198 -2.459728

C 3.134441 -1.973156 -1.829199

C 1.675456 -0.996954 -3.481818

C 1.204817 -0.675237 -1.112148

C 2.333923 -1.447521 -0.811730

C 2.811126 -1.744410 -3.168266

H 1.405000 -0.819103 -4.525423

H 2.609853 -1.638658 0.229592

H 3.437191 -2.153167 -3.963618

H 4.016577 -2.565295 -1.573931

C 1.627806 2.201480 -0.294184

C 3.000931 1.730701 -0.638246

H 3.428855 1.076062 0.128538

H 3.647593 2.618366 -0.721906

H 3.038409 1.222506 -1.609803

C 0.878121 2.891732 -1.384642

H 0.780767 2.242686 -2.266860

H 1.444911 3.772945 -1.721816

H -0.119154 3.219997 -1.069736

H -0.018107 0.093844 -2.729962

**[Pd(Ph)(h2-CH2=CMe2-**⊥**)(DMPE)]+**


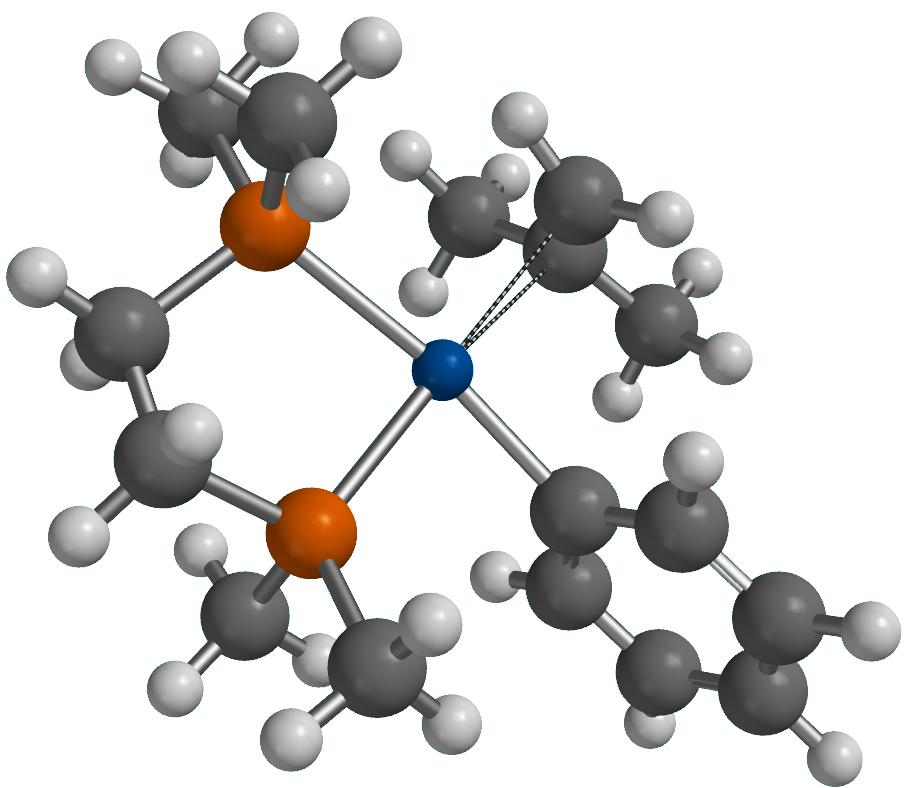


48

Pd 0.115795 0.230183 0.247284

P -1.574199 1.033225 1.763272

P -1.190633 -1.630259 0.079782

C -2.976298 -0.152265 1.598465

H -3.565433 0.162252 0.724504

H -3.638351 -0.077420 2.472502

C -2.451925 -1.565631 1.417505

H -3.256781 -2.277847 1.186243

H -1.963010 -1.926169 2.334308

C -0.427748 -3.267218 0.214265

H 0.212034 -3.446869 -0.657510

H -1.208516 -4.037462 0.257057

H 0.187697 -3.323641 1.119237

C -2.142988 -1.680854 -1.464093

H -1.462666 -1.772681 -2.318153

H -2.729862 -0.762772 -1.580960

H -2.819968 -2.545157 -1.453585

C -1.053439 0.845908 3.500523

H -0.246052 1.553104 3.725085

H -0.673311 -0.167475 3.675908

H -1.892678 1.037108 4.182229

C -2.372310 2.668787 1.738276

H -2.771491 2.882802 0.740044

H -1.641309 3.444162 1.997788

H -3.191080 2.703737 2.468543

C 1.587653 1.977303 0.822784

H 2.498743 1.439180 1.093485

H 1.019867 2.431483 1.635339

C 1.285453 -0.939826 -2.313797

C 3.499241 -2.102187 -1.089955

C 2.236689 -1.613744 -3.084886

C 1.433343 -0.827209 -0.926191

C 2.544187 -1.430727 -0.322069

C 3.347662 -2.196658 -2.474526

H 2.107020 -1.682652 -4.167354

H 2.682463 -1.375599 0.761829

H 4.090734 -2.725351 -3.074350

H 4.365118 -2.556193 -0.602364

C 1.368941 2.351217 -0.476034

C 2.354287 2.066957 -1.557868

H 3.116881 1.339221 -1.264145

H 2.858191 3.012008 -1.811921

H 1.865682 1.722596 -2.478719

C 0.228525 3.234895 -0.861376

H -0.377045 2.773772 -1.655692

H 0.613590 4.173151 -1.287073

H -0.422010 3.480432 -0.017162

H 0.429308 -0.479617 -2.816475

**[Pd(Ph)(DiPPE)]**

**
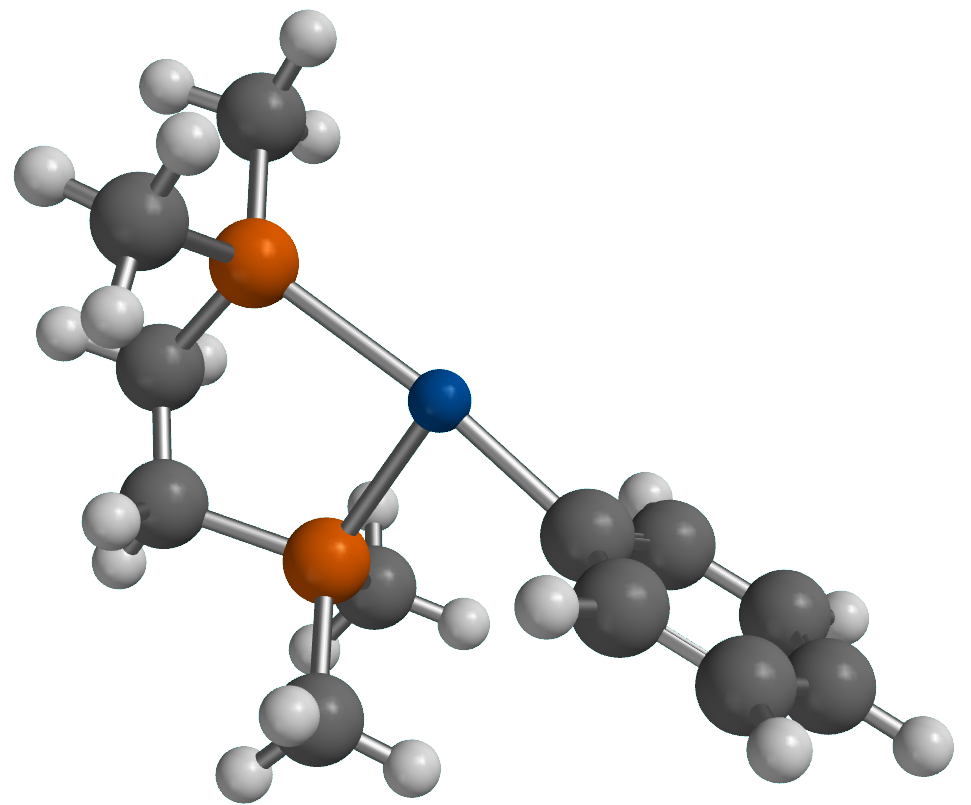
**

36

Pd -0.555061 -0.879091 0.085420

P 1.072327 -1.854711 1.556709

P 0.729103 0.940082 -0.048025

C 2.495262 -0.697355 1.358033

H 3.031783 -0.997260 0.446040

H 3.198362 -0.815495 2.194274

C 2.010534 0.738746 1.253166

H 2.831943 1.436803 1.034428

H 1.552573 1.073203 2.195605

C -0.012015 2.562549 0.234121

H -0.653641 2.830392 -0.612237

H 0.788213 3.307568 0.335624

H -0.613469 2.551377 1.149865

C 1.608971 1.051484 -1.624359

H 0.894318 1.220807 -2.437411

H 2.158094 0.124078 -1.821949

H 2.316453 1.890458 -1.584134

C 0.686565 -1.766447 3.334862

H -0.126981 -2.460505 3.576254

H 0.360207 -0.754187 3.601408

H 1.568754 -2.028229 3.933989

C 1.805508 -3.504924 1.347095

H 2.149014 -3.636244 0.314776

H 1.056080 -4.274581 1.564831

H 2.655695 -3.636356 2.029359

C -1.731549 -0.045918 -2.539634

C -3.938013 1.269300 -1.446925

C -2.756685 0.412924 -3.371903

C -1.816175 0.127689 -1.151839

C -2.913568 0.813693 -0.613433

C -3.859759 1.070381 -2.826363

H -2.687867 0.259818 -4.451001

H -2.983649 0.994689 0.462998

H -4.655170 1.436813 -3.477738

H -4.796385 1.788878 -1.015709

H -0.869776 -0.550428 -2.986195

**[Pd((Ph)(H2O)(DMPE)]+**


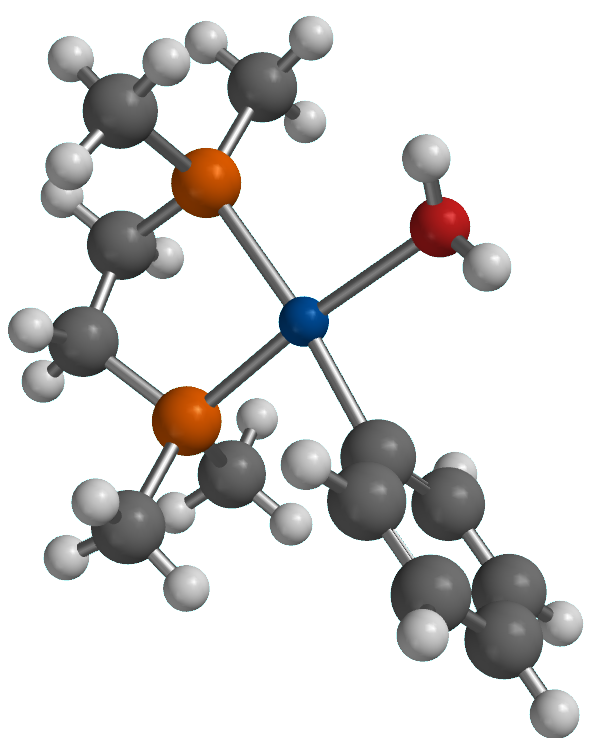


39

Pd 0.400883 0.691174 0.115159

P -1.261429 1.584900 1.582981

P -0.929630 -1.088503 -0.098227

C -2.716804 0.481765 1.331288

H -3.234802 0.831810 0.426393

H -3.424712 0.586325 2.165298

C -2.257769 -0.957664 1.169354

H -3.084693 -1.627163 0.892468

H -1.836795 -1.344662 2.109067

C -0.219603 -2.740275 0.111361

H 0.453756 -2.959894 -0.724923

H -1.023637 -3.487354 0.134348

H 0.350140 -2.792671 1.045967

C -1.786205 -1.141556 -1.695613

H -1.053994 -1.255451 -2.503206

H -2.346047 -0.213598 -1.858789

H -2.480729 -1.991689 -1.717330

C -0.900018 1.434127 3.362576

H -0.061301 2.087536 3.630756

H -0.617206 0.402488 3.603394

H -1.776106 1.714899 3.962222

C -1.919949 3.270510 1.409678

H -2.248969 3.440405 0.378188

H -1.135343 3.999101 1.646650

H -2.767006 3.430834 2.089701

C 1.622866 -0.115377 -2.536372

C 3.778451 -1.512433 -1.457338

C 2.605445 -0.646542 -3.378072

C 1.707686 -0.269068 -1.145948

C 2.793977 -0.982044 -0.618612

C 3.684919 -1.347741 -2.840134

H 2.523824 -0.512566 -4.459203

H 2.882841 -1.134430 0.461218

H 4.450009 -1.766647 -3.496405

H 4.619710 -2.060960 -1.027212

H 0.783784 0.427707 -2.981483

O 1.798819 2.442138 0.134675

H 1.946235 2.905361 0.968453

H 2.679398 2.217209 -0.192328

**TS3-Pd**

**
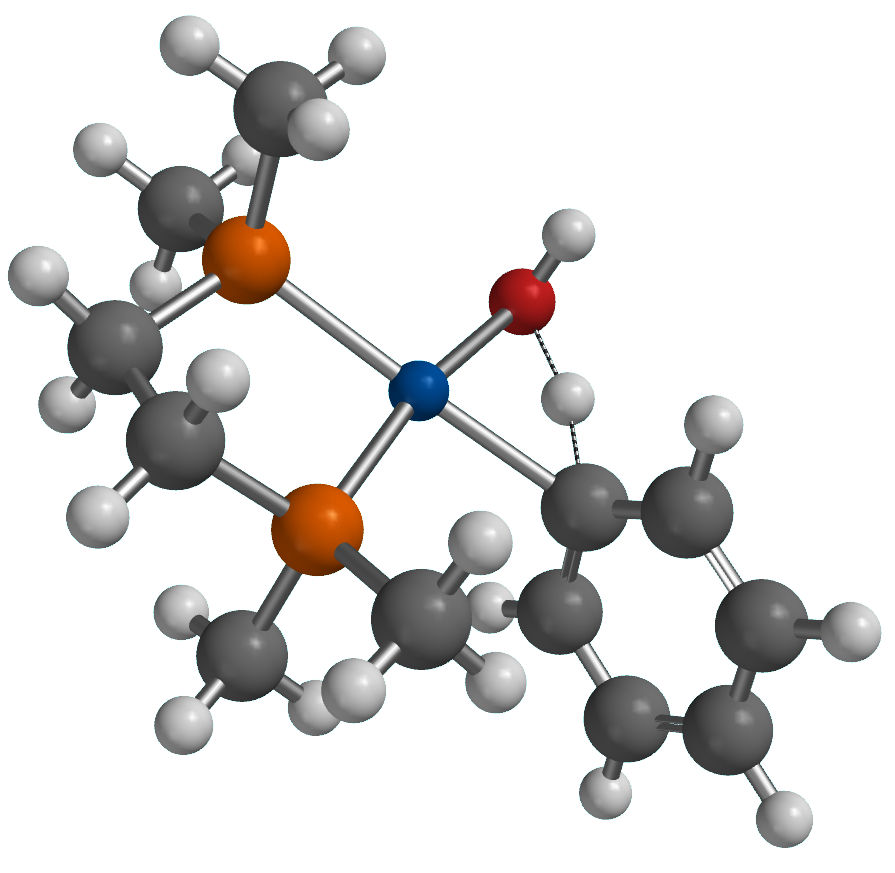
**

39

Pd 0.366496 0.873215 0.209174

P -1.355495 1.520783 1.592670

P -0.871657 -0.986149 -0.111851

C -2.748067 0.339289 1.386279

H -3.330516 0.674480 0.516139

H -3.415970 0.384580 2.257141

C -2.190589 -1.056573 1.163877

H -2.966908 -1.770925 0.856742

H -1.732039 -1.452848 2.081393

C 0.002314 -2.568090 -0.066519

H 0.710239 -2.615771 -0.902505

H -0.717936 -3.391798 -0.156690

H 0.556337 -2.669624 0.873300

C -1.730583 -0.953125 -1.708241

H -0.996880 -0.952298 -2.522569

H -2.349053 -0.052480 -1.793135

H -2.369682 -1.841341 -1.801643

C -0.899121 1.449202 3.346928

H -0.067353 2.135894 3.542691

H -0.584453 0.434444 3.615940

H -1.757100 1.738406 3.968461

C -2.020190 3.182183 1.327628

H -2.387443 3.279920 0.300049

H -1.228237 3.922476 1.491214

H -2.842461 3.377385 2.028713

C 1.822349 0.198101 -2.448863

C 3.594756 -1.637947 -1.318549

C 2.428421 -0.764055 -3.254103

C 2.082874 0.262113 -1.065757

C 2.978529 -0.678137 -0.518840

C 3.313400 -1.684067 -2.686381

H 2.215625 -0.799813 -4.324285

H 3.203917 -0.650878 0.551309

H 3.788403 -2.440277 -3.314276

H 4.291814 -2.354668 -0.880163

H 1.135637 0.917983 -2.903667

O 1.729523 2.555980 0.168935

H 2.091041 1.501620 -0.482912

H 2.250059 2.572810 0.982366

**[Pd(OH)(Ph-H)(DMPE)]+**


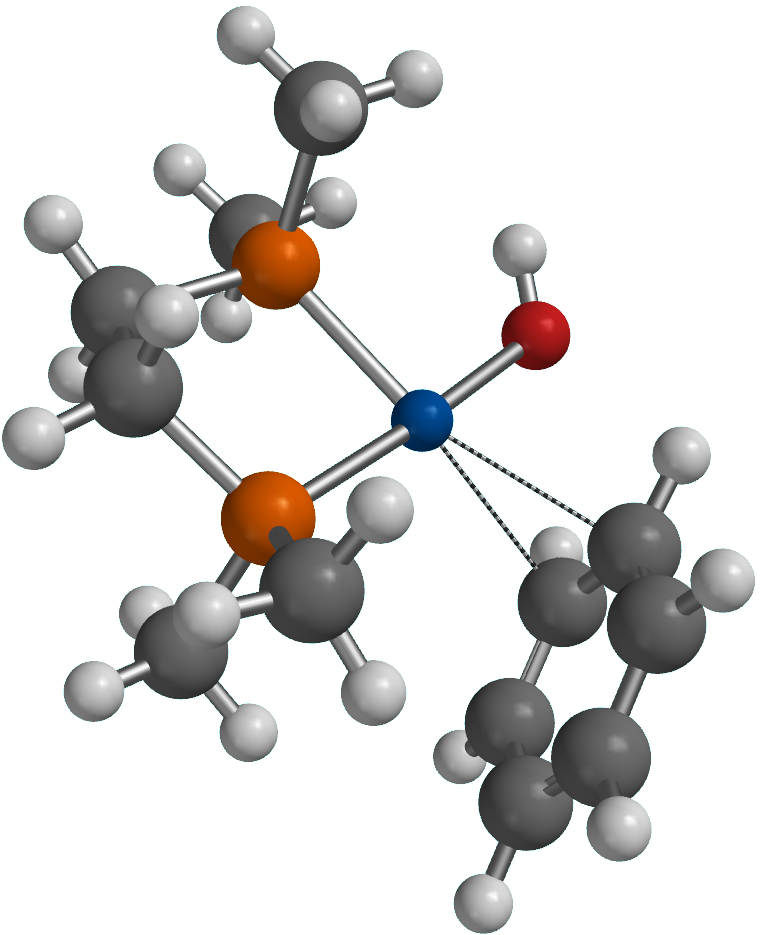


39

Pd 0.588491 0.770188 0.283956

P -1.124407 1.366117 1.621037

P -0.719568 -1.042750 -0.268951

C -2.573100 0.309106 1.251450

H -3.082901 0.755489 0.385758

H -3.275518 0.345477 2.095637

C -2.099814 -1.097678 0.947224

H -2.908323 -1.731467 0.558046

H -1.712432 -1.589640 1.851088

C -0.057044 -2.731343 -0.238048

H 0.593231 -2.908859 -1.099662

H -0.895091 -3.439897 -0.278147

H 0.514872 -2.898682 0.681423

C -1.540984 -0.891949 -1.882827

H -0.797972 -0.917042 -2.687579

H -2.085055 0.057746 -1.943105

H -2.246113 -1.722305 -2.020536

C -0.731585 1.125660 3.371573

H 0.141692 1.728675 3.645214

H -0.506798 0.071638 3.569064

H -1.589667 1.435448 3.983178

C -1.661301 3.081399 1.450457

H -1.924943 3.291278 0.408309

H -0.858155 3.759679 1.757869

H -2.538334 3.249310 2.089952

C 1.828952 0.265192 -2.818015

C 3.142285 -1.223296 -0.839983

C 2.083280 -1.087534 -3.012408

C 2.245867 0.892977 -1.634258

C 2.901409 0.144134 -0.638679

C 2.746640 -1.829165 -2.026598

H 1.771094 -1.573291 -3.938512

H 3.283812 0.649521 0.248858

H 2.947489 -2.889371 -2.189823

H 3.661164 -1.800436 -0.073302

H 1.324755 0.847529 -3.590715

O 1.649070 2.435748 0.829427

H 1.369873 2.821031 1.664710

H 2.135128 1.971360 -1.513081

**Cis-[Pd(m-OH)(DMPE)]22+**

**
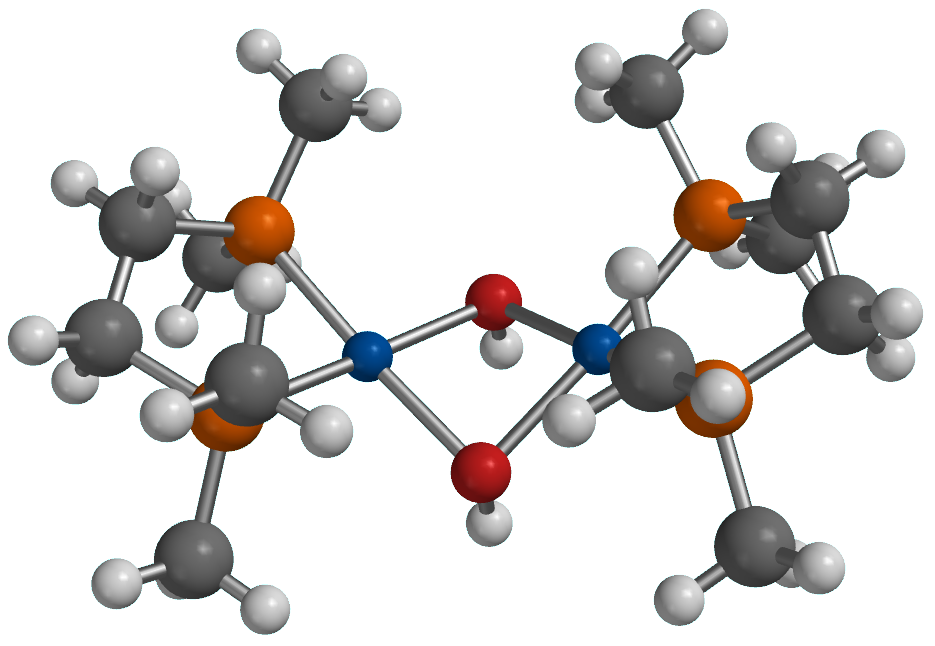
**

54

H 1.450035 3.397978 0.378502

H -1.474633 3.383357 0.353295

H 0.012105 1.508250 -2.373101

O 0.004807 1.454465 -1.409355

C 4.497126 -0.662427 0.452164

C 4.157807 0.684830 1.067136

C 2.148537 2.832099 1.004939

C 3.845182 2.386371 -1.294556

C 2.305708 -2.339067 1.440761

C 3.386754 -2.828986 -1.192304

H 5.096141 -0.540844 -0.461841

H 5.076782 -1.298139 1.134946

H 3.701422 0.562789 2.059894

H 5.045062 1.319425 1.195882

H 4.524281 3.125012 -0.848451

H 3.036148 -3.073342 1.805091

Pd 1.478629 0.014507 -0.805090

P 2.921579 1.537058 0.010277

P 2.945238 -1.511847 -0.037883

C -4.165941 0.649004 1.022236

C -4.493825 -0.697829 0.400114

C -3.364895 -2.840464 -1.261419

C -2.300234 -2.377987 1.382752

C -3.855616 2.356201 -1.335565

C -2.175944 2.814551 0.973835

H -3.711832 0.525493 2.015811

H -5.057956 1.276877 1.150814

H -5.090709 -0.576145 -0.515305

H -5.071580 -1.340535 1.077986

H -3.030091 -3.118802 1.734835

H -4.543651 3.088283 -0.892334

Pd -1.468582 0.004126 -0.829412

P -2.935053 -1.535320 -0.089051

P -2.931657 1.513761 -0.026526

H -2.462807 -3.402389 -1.528387

H 2.488111 -3.397161 -1.457784

H 0.024048 -1.465478 -2.420774

O 0.015064 -1.416076 -1.457153

H -1.631429 2.371481 1.815118

H -2.950711 3.491506 1.356748

H -2.103654 -1.654208 2.181832

H -1.363438 -2.888270 1.131383

H 2.103637 -1.606279 2.230246

H 1.371381 -2.855221 1.192359

H 4.112794 -3.505870 -0.723096

H 3.822708 -2.403729 -2.102791

H 4.427858 1.665755 -1.879326

H 3.145732 2.899441 -1.964794

H 2.915645 3.512898 1.396251

H 1.598357 2.384936 1.840346

H -3.157173 2.876258 -2.001387

H -4.428753 1.631262 -1.924449

H -3.797438 -2.406201 -2.169287

H -4.091077 -3.525358 -0.804131

***Trans*-[Pd(m-OH)(DMPE)]22+**


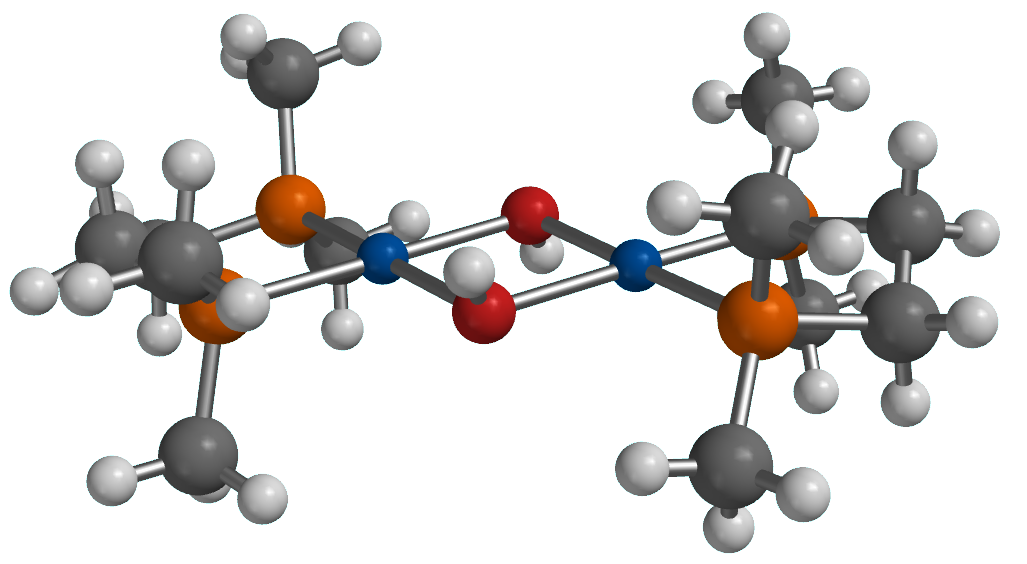


54

Pd 0.000032 -0.003626 1.603087

P -1.520934 0.010286 3.262624

P 1.520377 -0.008582 3.263410

C -0.680057 -0.338533 4.855942

H -0.577254 -1.430381 4.932954

H -1.310736 -0.012638 5.694085

C 0.678438 0.340803 4.856190

H 1.308750 0.014698 5.694618

H 0.575895 1.432682 4.933290

C -2.290680 1.640890 3.432591

H -1.530524 2.398892 3.652664

H -3.029435 1.621933 4.244749

H -2.792118 1.909183 2.495556

C -2.884846 -1.165519 3.104613

H -2.497934 -2.187305 3.025220

H -3.470156 -0.932820 2.207583

H -3.539707 -1.092174 3.982857

C 2.881285 1.170470 3.103817

H 3.467586 0.937975 2.207412

H 3.536009 1.100220 3.982428

H 2.491720 2.191161 3.022597

C 2.294119 -1.636952 3.436311

H 2.796073 -1.905804 2.499706

H 1.535713 -2.396300 3.657896

H 3.032865 -1.614731 4.248376

O -1.407895 0.030507 -0.001128

H -1.986804 -0.739912 -0.004183

O 1.407747 -0.050587 -0.000859

H 1.995147 0.713363 -0.004695

Pd 0.000321 -0.004956 -1.606216

P -1.522534 -0.031257 -3.263973

P 1.522484 0.029755 -3.264484

C 2.875782 -1.154066 -3.086222

H 3.541587 -1.092327 -3.957017

H 2.477859 -2.171248 -3.003743

H 3.447990 -0.922219 -2.180878

C 2.303257 1.654071 -3.452813

H 3.037386 1.621296 -4.268825

H 2.814201 1.930637 -2.523057

H 1.547320 2.415069 -3.676847

C 0.682278 -0.329396 -4.856321

H 1.308018 0.002348 -5.695966

H 0.590953 -1.422386 -4.932191

C -2.303208 -1.654780 -3.459155

H -1.547331 -2.414743 -3.687012

H -3.037935 -1.618527 -4.274534

H -2.813490 -1.935443 -2.530283

C -0.683087 0.335581 -4.854461

H -0.591657 1.428914 -4.924882

H -1.309195 0.008153 -5.695451

C -2.875889 1.151419 -3.079150

H -3.542586 1.093309 -3.949498

H -2.478247 2.168380 -2.992464

H -3.446953 0.915217 -2.174267

**[Pd(CH2CMe2Ph)(PMe3)(DMPE)]+**


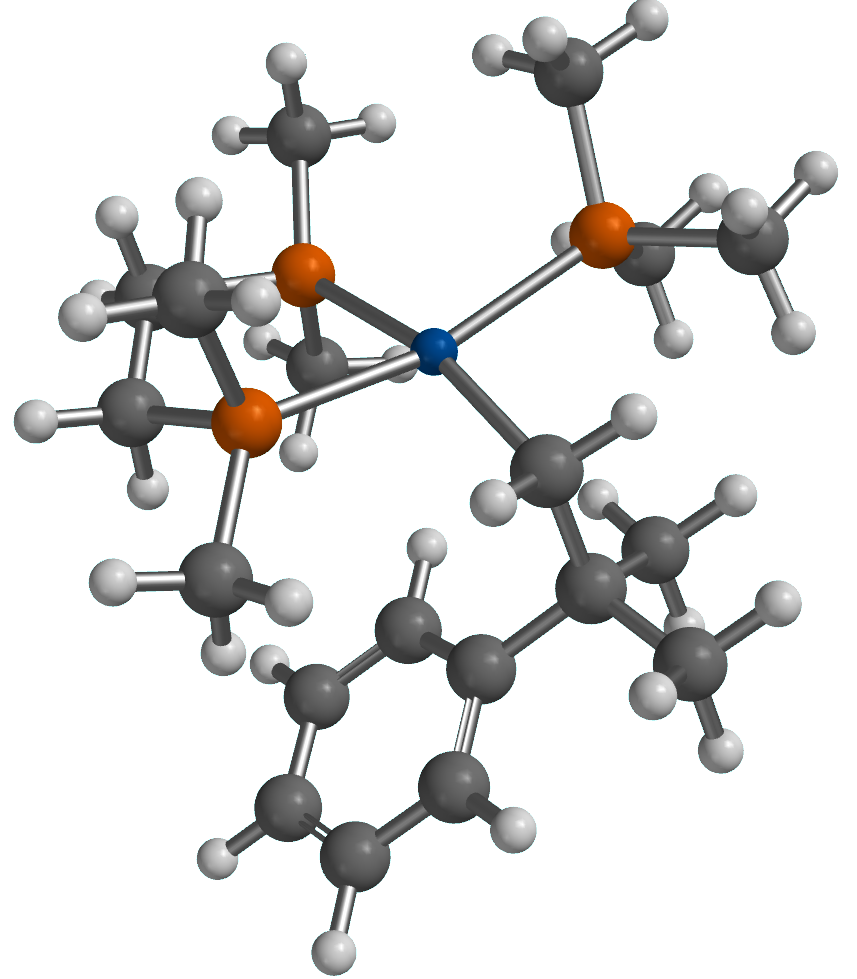


61

Pd 0.514373 -0.622437 0.290415

P -1.593158 -1.600320 0.080663

P -0.102971 -0.473137 2.599515

C -2.582597 -1.222042 1.585268

H -3.458372 -1.884786 1.632448

H -2.963128 -0.195803 1.471445

C -1.713598 -1.350545 2.824656

H -1.480215 -2.405613 3.028463

H -2.219760 -0.960963 3.719212

C -2.755108 -1.418264 -1.300638

H -3.173804 -0.406725 -1.318330

H -3.570780 -2.144489 -1.191528

H -2.243814 -1.601841 -2.252909

C -1.333372 -3.402929 0.172192

H -0.831241 -3.744581 -0.740796

H -2.292200 -3.929687 0.269603

H -0.693309 -3.656217 1.025336

C -0.538741 1.267481 2.943667

H 0.335562 1.913503 2.799218

H -0.900428 1.379582 3.974061

H -1.326052 1.602139 2.258446

C 0.831078 -0.954185 4.089475

H 1.124707 -2.008882 4.033953

H 0.214566 -0.802938 4.985183

H 1.735034 -0.340668 4.182639

C 0.674508 -0.429898 -1.821068

H -0.017919 -1.124880 -2.319817

H 1.686247 -0.729135 -2.129718

C 0.405609 0.999668 -2.343340

C -1.046112 1.413183 -2.087938

C -3.717064 2.202113 -1.559647

C -1.462154 1.781616 -0.797683

C -2.007049 1.459069 -3.105363

C -3.324133 1.847697 -2.848323

C -2.773519 2.166321 -0.530748

H -0.739093 1.772196 0.020452

H -4.046081 1.872270 -3.666698

H -3.059496 2.446487 0.485274

H -4.743999 2.510024 -1.357378

C 0.725250 0.995811 -3.843022

H 0.161359 0.226624 -4.385656

H 1.791514 0.783771 -3.992988

H 0.509090 1.967200 -4.310233

C 1.333865 2.027803 -1.684683

H 2.384542 1.782708 -1.881491

H 1.204498 2.076989 -0.596469

H 1.153203 3.033552 -2.087577

H -1.735468 1.190131 -4.126010

P 2.832621 -0.285729 0.586914

C 3.378758 1.256411 1.391954

H 4.462167 1.234205 1.568324

H 2.865758 1.376425 2.353805

H 3.140921 2.121873 0.762777

C 3.953208 -0.438029 -0.844985

H 4.994019 -0.346951 -0.508966

H 3.818796 -1.421144 -1.312260

H 3.758371 0.328716 -1.601128

C 3.508440 -1.578830 1.683711

H 3.303071 -2.569259 1.261014

H 3.048945 -1.526086 2.675268

H 4.594653 -1.458575 1.792037

**[Pd(Ph)(PMe3)(DMPE)]+**


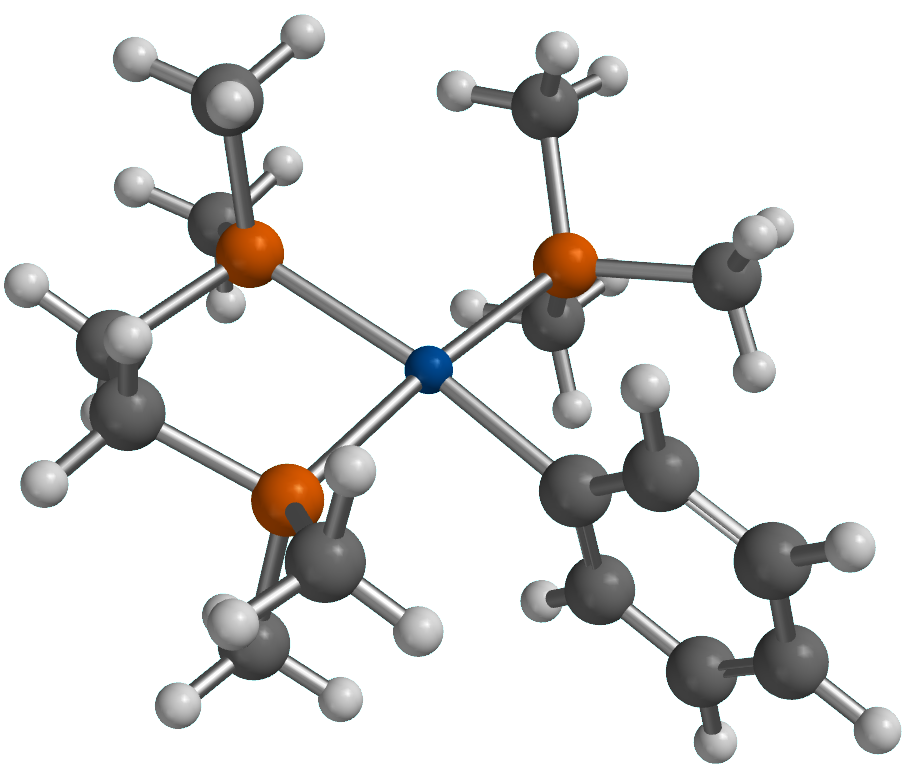


49

Pd -0.104085 0.098972 -0.008303

P -2.351894 0.610997 0.577428

P 0.339301 0.441923 2.247131

C -2.410099 0.614007 2.424178

H -2.516745 -0.434824 2.738753

H -3.311241 1.141293 2.767738

C -1.145691 1.222828 3.006458

H -1.107777 1.118777 4.100092

H -1.089521 2.299029 2.785706

C -2.914189 2.285170 0.126758

H -2.202477 3.031155 0.500101

H -3.904196 2.489552 0.555562

H -2.970598 2.384999 -0.963237

C -3.747986 -0.462946 0.117443

H -3.531027 -1.497621 0.407623

H -3.911490 -0.434949 -0.965853

H -4.667869 -0.135561 0.619273

C 1.747651 1.467032 2.750917

H 2.679355 0.973939 2.448938

H 1.750874 1.605605 3.839677

H 1.697482 2.446233 2.261099

C 0.565804 -1.115877 3.156491

H 1.452850 -1.635478 2.775002

H -0.303516 -1.768571 3.014596

H 0.698155 -0.919682 4.228589

C 2.361657 -1.652113 -0.139975

C 4.181664 0.346713 -0.795860

C 3.706280 -1.972753 -0.351447

C 1.902089 -0.332870 -0.261108

C 2.836468 0.661188 -0.585080

C 4.621712 -0.973371 -0.683446

H 4.037918 -3.009626 -0.257784

H 2.517986 1.703454 -0.682692

H 5.671720 -1.220741 -0.850694

H 4.890035 1.138668 -1.051157

H 1.663308 -2.455101 0.116237

P -0.425520 -0.398298 -2.292208

C 1.027253 -0.269994 -3.381127

H 1.419379 0.753890 -3.365973

H 0.751980 -0.534104 -4.410459

H 1.818691 -0.944128 -3.033362

C -1.683606 0.571392 -3.185644

H -1.413490 1.634085 -3.175344

H -2.664369 0.459451 -2.709766

H -1.758477 0.234752 -4.227992

C -0.968353 -2.122059 -2.515361

H -0.216944 -2.803112 -2.097680

H -1.100970 -2.350772 -3.581332

H -1.917482 -2.290549 -1.992909
